# Supplementary material for: A Single-Cell Network-Based Drug Repositioning Strategy for Post-COVID-19 Pulmonary Fibrosis
Source: MDPI journal article supplement (doi:10.3390/pharmaceutics14050971), 2022-04-30
Supplement: s1 [file s1]

## **Supplementary information**

### **A single-cell network-based drug repositioning strategy for post-COVID-19 pulmonary fibrosis**

Albert Li, Jhih-Yu Chen, Chia-Lang Hsu, Yen-Jen Oyang, Hsuan-Cheng Huang, Hsueh-Fen Juan

The supplementary data includes:

#### **1. Supplementary Figures**

**Supplementary Figure S1.** The expression of DEGs in PCPF patients and the controls

**Supplementary Figure S2.** The correlation analysis between age and other clinical features

**Supplementary Figure S3.** The degree effect on proximity.

**Supplementary Figure S4.** Characterizing the roles of proximity on the repurposing of anti-fibrosis drugs.

#### **2. Supplementary Tables**

**Supplementary Table S1.** The transcriptome signature of pathological fibroblasts in PCPF.

**Supplementary Table S2.** The full list with 5644 drugs and their proximity (Zds). (A separate excel file).

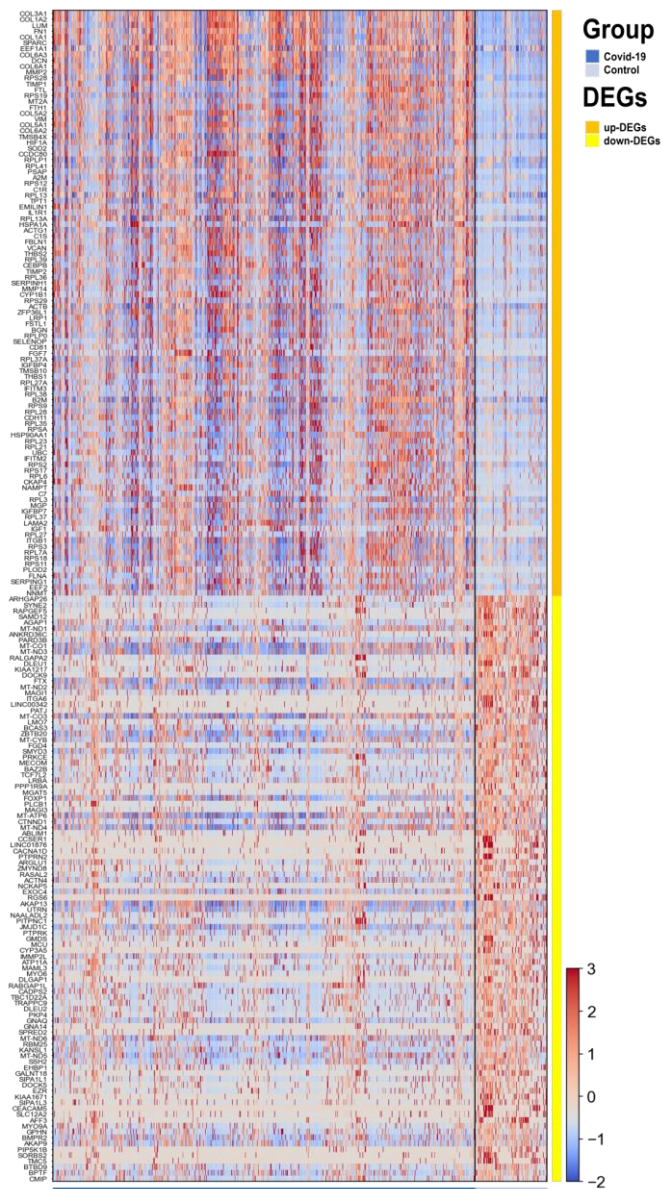

**Supplementary Figure S1.** Visualization of the expression of the up- and down-regulated differentially expressed genes. The values in the heatmap represent scaled gene expression.

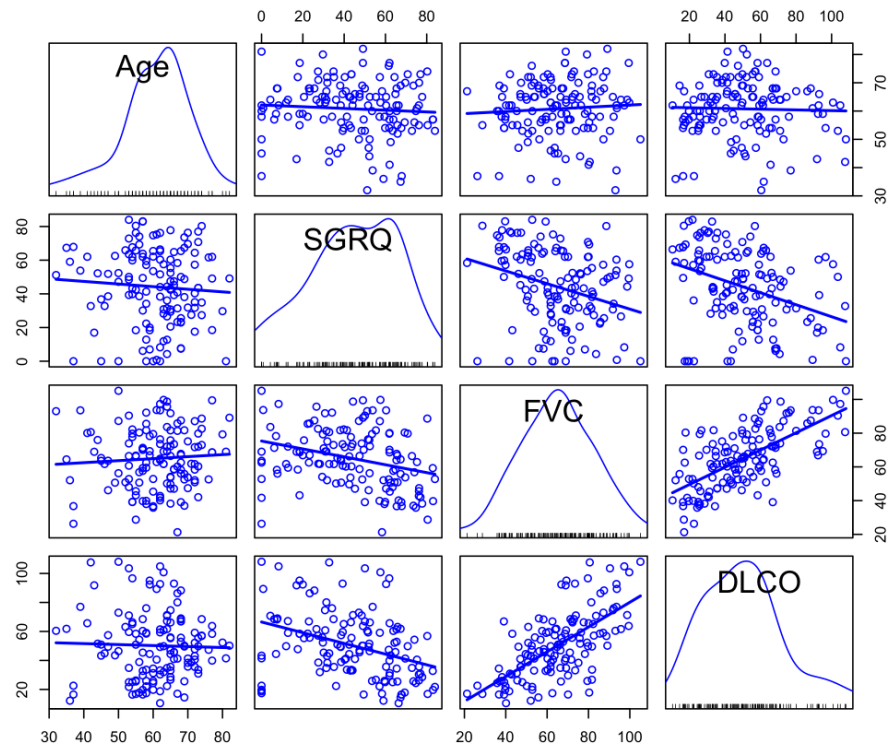

**Supplementary Figure S2.** The correlation analysis between age and other clinical features: SGRQ, FVC, and DLCO.

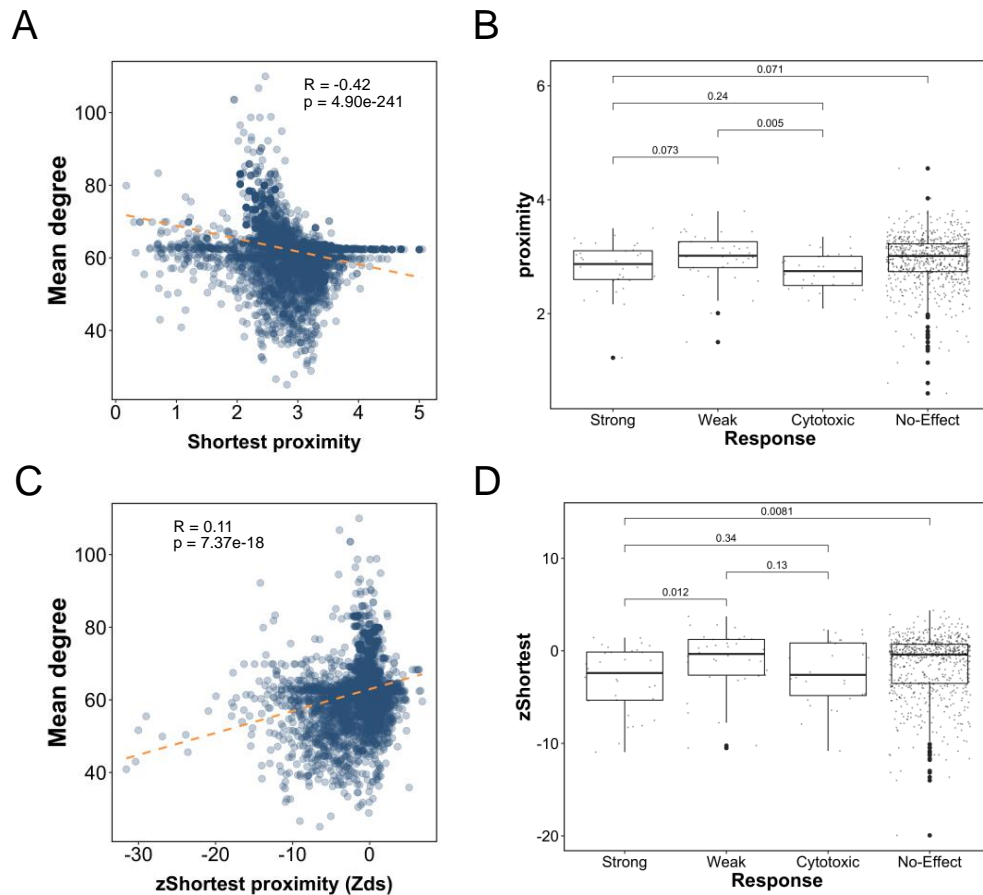

**Supplementary Figure S3.** The degree effect on proximity. **(A)** Correlation analysis of node degree and shortest proximity. **(B)** Comparison of shortest proximity in different drug categories. **(C)** Correlation analysis of node degree and z-transformed shortest proximity (Zds). **(D)** Comparison of Zds in different drug categories.

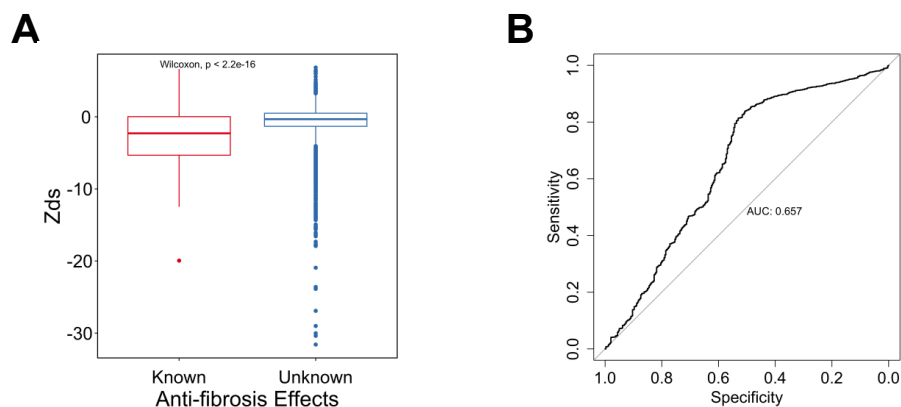

**Supplementary Figure S4.** Characterizing the roles of proximity on the repurposing of anti-fibrosis drugs.

(**A**) The comparison of proximity, Zds, between drugs with known and unknown anti-fibrosis effects. (**B**) Analysis of the predictive performance of Zds on anti- fibrosis effects using a ROC curve.

**Supplementary Table S1. The transcriptome signature of pathological fibroblasts in PCPF.**

|        |         |          |          |          |         |          |        |          |         |
|--------|---------|----------|----------|----------|---------|----------|--------|----------|---------|
| COL3A1 | COL6A2  | VCAN     | IGFBP4   | CKAP4    | HSPA1B  | RARRES2  | RPS24  | COL14A1  | AEBP1   |
| COL1A2 | TMSB4X  | THBS2    | TMSB10   | NAMPT    | LAPTM4A | RPL18    | RPS27A | FAP      | NUPR1   |
| LUM    | HIF1A   | RPL39    | THBS1    | C7       | RPS27   | RPL29    | RPS14  | RPS25    | LAMP2   |
| FN1    | SOD2    | CEBPB    | RPL27A   | RPL3     | HSPB1   | RPS6     | GNAS   | SERPINF1 | MXRA5   |
| COL1A1 | CCDC80  | TIMP2    | IFITM3   | MGP      | PTGDS   | CFH      | COL4A1 | TUBA1B   | RPL30   |
| SPARC  | RPLP1   | RPL36    | RPL38    | IGFBP7   | RPL35A  | ANXA5    | ELL2   | MYL6     | S100A10 |
| EEF1A1 | RPL41   | SERPINH1 | B2M      | RPL37    | RPL9    | PCOLCE   | PIIB   | RPL34    | CXCL12  |
| COL6A3 | PSAP    | MMP14    | RPS9     | LAMA2    | HSP90B1 | ADAM12   | LOX    | PIEZO2   | RPS7    |
| DCN    | A2M     | CYP1B1   | RPL28    | IGF1     | SPON1   | MAN1A1   | RPS23  | EFEMP1   | CRTAP   |
| COL6A1 | RPS12   | RPS29    | CDH11    | RPL27    | TNC     | P4HB     | MRC2   | LTBP2    | RPL12   |
| MMP2   | C1R     | ACTB     | RPL35    | ITGB1    | RPL17   | NR2F1    | TXNDC5 | GXYLT2   | ADAMTS2 |
| RPS28  | RPL13   | ZFP36L1  | RPSA     | RPS3     | RPLP2   | RPL15    | RPS8   | RPL32    | CEBPD   |
| TIMP1  | TPT1    | LRP1     | HSP90AA1 | RPL7A    | FBN1    | CTHRC1   | CALU   | METTTL7A | CALR    |
| FTL    | EMILIN1 | FSTL1    | RPL23    | RPS18    | MOXD1   | ATP5F1E  | CCN1   | PTMS     | PTK7    |
| RPS19  | IL1R1   | BGN      | RPL21    | RPS11    | TGM2    | C11orf96 | CST3   | FNDC3B   | ABCA1   |
| MT2A   | RPL13A  | RPLP0    | UBC      | PLOD2    | PRRX1   | IL6ST    | RPL8   | OAZ1     | SCARB2  |
| FTH1   | HSPA1A  | SELENOP  | IFITM2   | FLNA     | FKBP10  | PDGFRA   | VGLL3  | SERPINE1 | PLXDC2  |
| COL5A2 | ACTG1   | CD81     | RPS2     | SERPING1 | COL15A1 | HSP90AB1 | CDKN1A | ROR2     | ZMAT3   |
| VIM    | C1S     | FGF7     | RPS17    | EEF2     | LGALS1  | CRISPLD2 | NBL1   | HMCN1    | SQSTM1  |
| COL5A1 | FBLN1   | RPL37A   | RPL6     | NNMT     | NFIX    | RPS13    | FBLN2  | RPL18A   | GAPDH   |
