# Supplementary material for: A Single-Cell Network-Based Drug Repositioning Strategy for Post-COVID-19 Pulmonary Fibrosis
Source: Pharmaceutics. 2022 Apr 30;14(5):971. doi: 10.3390/pharmaceutics14050971 (PMC9147547; doi:10.3390/pharmaceutics14050971)
Supplement: Supplementary file 1 [file pharmaceutics-14-00971-s001.zip › Table S2.xlsx]

## Sheet: SuppTableS2
Supplementary Table S2. The full list with 5644 drugs and their proximity (Zds).
Name	zShortest
Flavin adenine dinucleotide	-31.582
Beta-D-Glucose	-30.3756
Flavin mononucleotide	-30.0171
Lauryl Dimethylamine-N-Oxide	-29.0076
Formic acid	-26.9059
S-adenosyl-L-homocysteine	-23.8625
2-(N-Morpholino)-Ethanesulfonic Acid	-23.5947
2-Phosphoglycolic Acid	-20.9301
Ciprofloxacin	-19.9439
Benzoic Acid	-17.914
Guanosine-5'-Diphosphate	-17.8845
Omadacycline	-17.7287
Adenosine-5'-[Beta, Gamma-Methylene]Triphosphate	-17.6456
Tetracycline	-17.3163
Uridine-5'-Diphosphate	-16.5595
3-sulfino-L-alanine	-16.3183
Cefonicid	-16.3046
Heme C	-16.0485
Guanosine-5'-Triphosphate	-15.5839
7n-Methyl-8-Hydroguanosine-5'-Diphosphate	-15.4313
Glycerin	-15.4277
N-acetyl-alpha-neuraminic acid	-15.345
Dextrose, unspecified form	-15.1967
Cysteinesulfonic Acid	-14.9335
Cefpiramide	-14.9239
Myristic acid	-14.3137
Artenimol	-14.1847
B-2-Octylglucoside	-14.0945
Tromethamine	-14.0204
Probenecid	-14.0066
Taurocholic Acid	-13.9791
Lysine Nz-Carboxylic Acid	-13.806
Phenol	-13.6515
Cefoperazone	-13.569
Cefalotin	-13.5559
Dexfosfoserine	-13.4531
Inosinic Acid	-13.2866
Pefloxacin	-13.2408
Cefazolin	-13.1475
(6R)-Folinic acid	-13.0002
Troleandomycin	-12.9813
Letermovir	-12.9482
Tenofovir disoproxil	-12.9285
alpha-D-glucose 6-phosphate	-12.9263
Proline	-12.8394
Chlortetracycline	-12.699
Sulfamethazine	-12.5023
Acetoacetyl-CoA	-12.4914
Besifloxacin	-12.4843
Quercetin	-12.4806
Propanoic acid	-12.3847
Hyaluronic acid	-12.326
Triethyl Phosphate	-12.2674
Glyphosate	-12.1602
2-phospho-D-glyceric acid	-12.0971
Finafloxacin	-12.0801
Iopodic acid	-12.075
3-phospho-D-glyceric acid	-12.0381
Gatifloxacin	-12.0106
Pidolic Acid	-11.9409
Cephalexin	-11.8546
Zidovudine	-11.7858
Tauroursodeoxycholic acid	-11.7284
Indometacin	-11.657
Oxazepam	-11.5009
Dithioerythritol	-11.4497
Testosterone undecanoate	-11.4482
Lactose	-11.4383
2-Deoxy-2,3-Dehydro-N-Acetyl-Neuraminic Acid	-11.4168
Equilenin	-11.3985
Cloxacillin	-11.3965
7-methyl-GpppA	-11.3757
Bis(Adenosine)-5'-Pentaphosphate	-11.3718
Capric acid	-11.331
Mercaptopurine	-11.2887
Chloramphenicol	-11.244
Cholic Acid	-11.2411
Benzylpenicillin	-11.205
Triclosan	-11.1168
Glycine	-10.98
Methotrexate	-10.9474
Adenosine-5-Diphosphoribose	-10.9392
Moxidectin	-10.921
Cannabidiol	-10.9163
3-Indolebutyric Acid	-10.8605
Ampicillin	-10.8409
Heptane-1,2,3-Triol	-10.8352
Miconazole	-10.8122
Nabiximols	-10.7277
N-[N-[1-Hydroxycarboxyethyl-Carbonyl]Leucylamino-Butyl]-Guanidine	-10.5399
Atorvastatin	-10.5086
Ribavirin	-10.485
Rifamycin	-10.4679
Dinoprostone	-10.4514
3,4-Dihydroxycinnamic Acid	-10.421
Lauric acid	-10.4143
Phosphoenolpyruvate	-10.3938
2-HYDROXYMETHYL-6-OCTYLSULFANYL-TETRAHYDRO-PYRAN-3,4,5-TRIOL	-10.35
4-Iodo-L-phenylalanine	-10.3053
Medical Cannabis	-10.2956
Emodin	-10.253
Moxifloxacin	-10.2483
alpha-D-quinovopyranose	-10.2016
Dicloxacillin	-10.1826
Quinupristin	-10.1812
Camphor	-10.1128
Valproic Acid	-10.1124
Lactic acid	-10.1064
Methionine	-10.0926
Nadph Dihydro-Nicotinamide-Adenine-Dinucleotidephosphate	-10.0645
Fluvastatin	-10.0316
Cerulenin	-10.0307
2,4-Diamino-5-(3,4,5-Trimethoxy-Benzyl)-Pyrimidin-1-Ium	-9.98439
Nitrofurantoin	-9.96041
Adenine	-9.93527
Genistein	-9.9208
Ceftazidime	-9.85299
Boceprevir	-9.84158
Potassium perchlorate	-9.80423
Sulfinpyrazone	-9.79041
Ergocalciferol	-9.7662
Cyclacillin	-9.76206
Uridine-Diphosphate-N-Acetylglucosamine	-9.75373
Crizotinib	-9.70199
Tenofovir	-9.69918
Sulfamerazine	-9.65373
Amprenavir	-9.63693
3,6,9,12,15-Pentaoxaheptadecane	-9.63405
Vidarabine	-9.56518
Clotiazepam	-9.46247
Azidocillin	-9.45414
Naringenin	-9.4042
Elbasvir	-9.37697
Trovafloxacin	-9.328
L-Glutamine	-9.32707
(S)-camphor	-9.32362
Conjugated estrogens	-9.31632
Ceftriaxone	-9.30392
Copanlisib	-9.27048
L-Tryptophan	-9.23218
Cefepime	-9.19269
Fisetin	-9.18331
Guanine	-9.18134
Vitamin D	-9.18052
D-Myo-Inositol-Hexasulphate	-9.12537
Nafcillin	-9.11695
Adefovir dipivoxil	-9.09149
Testosterone	-9.08557
Caprylic acid	-9.0748
Ethanol	-9.0554
Etoposide	-9.04578
Delafloxacin	-9.03882
(2S)-1-(9H-Carbazol-4-yloxy)-3-(isopropylamino)propan-2-ol	-9.02428
Triazolam	-9.02033
Diazepam	-8.99605
N-cyclohexyltaurine	-8.98223
Testosterone enanthate	-8.95471
Fleroxacin	-8.95218
Cefotetan	-8.91187
Cefaclor	-8.87431
Salicylic acid	-8.83926
L-Citrulline	-8.82063
C31G	-8.80094
Fusidic acid	-8.78618
Aspartame	-8.77686
Oxacillin	-8.77346
Glyoxylic acid	-8.76941
Potassium chloride	-8.73834
Phenylpyruvic acid	-8.71732
Edoxudine	-8.70106
Ritonavir	-8.64996
Ornithine	-8.62482
Decylamine-N,N-Dimethyl-N-Oxide	-8.62268
Testosterone cypionate	-8.60252
Fructose	-8.58687
L-Lysine	-8.58228
Enoxacin	-8.56912
S-Ethylisothiourea	-8.55664
Sodium citrate	-8.54093
Cefmetazole	-8.53111
Oxiconazole	-8.43779
Thiodigalactoside	-8.42095
Immune Globulin Human	-8.37524
Rosuvastatin	-8.36862
Capravirine	-8.32578
Tretinoin	-8.32524
Acetazolamide	-8.29759
Temazepam	-8.28476
Omacetaxine mepesuccinate	-8.27587
Lidocaine	-8.25211
Glycinamide Ribonucleotide	-8.22693
Ibutilide	-8.22349
Xanthine	-8.20036
Irinotecan	-8.19773
Vinblastine	-8.18947
Hexane-1,6-Diol	-8.18771
Dalfopristin	-8.18582
Bumetanide	-8.1766
Dequalinium	-8.16102
Temafloxacin	-8.12916
methyl L-phenylalaninate	-8.12773
Estazolam	-8.12641
Nitrazepam	-8.11389
Dolutegravir	-8.10966
Sildenafil	-8.08192
Zinc	-8.07858
Framycetin	-8.06471
Aminomethylcyclohexane	-8.03045
Dicoumarol	-8.02245
Halazepam	-8.01539
Rosoxacin	-8.00588
Zinc chloride	-7.97463
Nitazoxanide	-7.93529
Prasugrel	-7.92506
Dactinomycin	-7.92293
Indinavir	-7.91892
Hydroxyamphetamine	-7.91431
Zinc acetate	-7.91402
Fish oil	-7.90877
Lubiprostone	-7.89499
Zomepirac	-7.89275
Ascorbic acid	-7.88264
Sunitinib	-7.8814
3-Hydroxy-Myristic Acid	-7.87327
Daclatasvir	-7.85762
Nicotine	-7.84188
Thiocolchicoside	-7.83794
6-Deoxyerythronolide B	-7.83781
Mannitol	-7.8376
Copper	-7.82829
Ivosidenib	-7.81535
Grepafloxacin	-7.8027
Collagenase clostridium histolyticum	-7.78041
Niacin	-7.77726
Florbetaben (18F)	-7.76909
Rifabutin	-7.76755
Bifonazole	-7.75032
N-Acetylmethionine	-7.74328
L-Leucine	-7.73979
Beta-(2-Naphthyl)-Alanine	-7.7242
Calanolide A	-7.69954
Tretazicar	-7.69644
Telaprevir	-7.68822
Rivaroxaban	-7.6018
2,3-Dihydroxy-Benzoic Acid	-7.58738
Nelfinavir	-7.5868
Prazepam	-7.54744
Stavudine	-7.54603
Bromazepam	-7.54023
Cethromycin	-7.53908
Ellagic Acid	-7.52492
Perhexiline	-7.51403
Zanamivir	-7.50606
Farnesyl diphosphate	-7.50577
Josamycin	-7.49796
Monoisopropylphosphorylserine	-7.4713
Domperidone	-7.46531
(R)-Propylene glycol	-7.46389
CLORAZEPATE	-7.4594
Rifalazil	-7.43893
Guanosine	-7.43455
1-Hexadecanosulfonic Acid	-7.43161
Retapamulin	-7.42505
1-Anilino-8-Naphthalene Sulfonate	-7.42157
Corticotropin	-7.42071
Ethanesulfonic Acid	-7.41626
Tetrahydrofolic acid	-7.4044
Levomenthol	-7.40427
Sevoflurane	-7.40229
Tetraferric tricitrate decahydrate	-7.39179
Dipyridamole	-7.38605
Alanosine	-7.37677
Posaconazole	-7.3711
Sulfaphenazole	-7.33069
Troglitazone	-7.31501
Desflurane	-7.24123
Fumaric Acid	-7.23383
Ribose-1-Phosphate	-7.22357
Griseofulvin	-7.20982
Cholecalciferol	-7.20939
Nevirapine	-7.19835
Chenodeoxycholic acid	-7.18964
Spiramycin	-7.1829
Loracarbef	-7.15393
Alpha-D-Glucose 1,6-Bisphosphate	-7.15366
alpha-Ketoisovalerate	-7.15246
Alfacalcidol	-7.1201
Fluticasone propionate	-7.10784
2-Acetamido-2-Deoxy-D-Glucono-1,5-Lactone	-7.09988
N-[4-Methyl-3-[[4-(3-Pyridinyl)-2-Pyrimidinyl]Amino]Phenyl]-3-Pyridinecarboxamide	-7.09914
Gemifloxacin	-7.09121
Alprostadil	-7.08495
Aspartic acid	-7.07709
Tezacaftor	-7.06985
Adinazolam	-7.04397
Alefacept	-7.04306
3'-THIO-THYMIDINE-5'-PHOSPHATE	-7.01796
Delavirdine	-7.01465
Olaparib	-7.00847
Elvitegravir	-6.99312
Pitavastatin	-6.99234
Hydroxocobalamin	-6.99233
Tacrolimus	-6.98972
Berberine	-6.98303
Mercuribenzoic Acid	-6.97585
Fosamprenavir	-6.97434
Olsalazine	-6.96032
Prasterone sulfate	-6.94132
Taribavirin	-6.93971
Cisplatin	-6.91612
Estrone sulfate	-6.90498
Idelalisib	-6.88569
Potassium nitrate	-6.8711
Glyceraldehyde-3-Phosphate	-6.86288
Phenylbutyric acid	-6.83306
Guvacine	-6.83264
Isoflurane	-6.82465
Neomycin	-6.81865
Degraded Cephaloridine	-6.80085
Ferric cation	-6.79851
Dexibuprofen	-6.79647
Sparfosic acid	-6.79344
Pyruvic acid	-6.7598
Sodium phosphate, monobasic, unspecified form	-6.74541
Enalapril	-6.73951
Methadone	-6.73457
Pravastatin	-6.72572
alpha-Tocopherol acetate	-6.72225
Ibuprofen	-6.71412
beta-D-Ribose-5-phosphate	-6.70152
Finasteride	-6.69636
Amphetamine	-6.68924
Flurazepam	-6.66086
Nitrendipine	-6.64711
Glucose-6-Phosphate	-6.64634
Glasdegib	-6.64252
5-Phosphoarabinonic Acid	-6.62984
Dextroamphetamine	-6.62698
5'-Guanosine-Diphosphate-Monothiophosphate	-6.58745
Sparfloxacin	-6.58305
Fostamatinib	-6.5812
Nisoldipine	-6.57396
Sofosbuvir	-6.56507
Trastuzumab emtansine	-6.5641
Oxaloacetate Ion	-6.55274
Lipoic Acid	-6.55223
METHYL-PHOSPHONIC ACID MONO-(4-NITRO-PHENYL) ESTER	-6.54233
Fluticasone	-6.52927
Teniposide	-6.52617
Edetic Acid	-6.50359
Methyltestosterone	-6.49792
Saquinavir	-6.49603
Bevacizumab	-6.48495
Picrotoxin	-6.47971
Glutamic Acid	-6.46995
Allosamizoline	-6.45843
Liotrix	-6.45297
Galantamine	-6.44862
Natalizumab	-6.44611
Fluticasone furoate	-6.43487
Paritaprevir	-6.43402
Halofuginone	-6.43244
Benzamidine	-6.42715
Daunorubicin	-6.42336
Sodium phosphate, dibasic	-6.38043
Lindane	-6.37269
Bedaquiline	-6.35212
Phenethylamine	-6.32742
Octanoyl-Coenzyme A	-6.29986
Praziquantel	-6.28549
7-[4-(Dimethylamino)Phenyl]-N-Hydroxy-4,6-Dimethyl-7-Oxo-2,4-Heptadienamide	-6.25965
Vemurafenib	-6.25868
Ethanolamine	-6.24866
Delamanid	-6.2274
Clarithromycin	-6.22693
Cobicistat	-6.21143
Abciximab	-6.20886
3-amino-5-phenylpentane	-6.20145
Crotamiton	-6.1942
Indolylpropionic Acid	-6.17717
Ezetimibe	-6.16214
Dabigatran etexilate	-6.15894
Artemether	-6.15216
Clotrimazole	-6.13153
Cytisine	-6.12968
5-iodotubercidin	-6.12864
Sulfapyridine	-6.11034
Estradiol valerate	-6.10971
Fidaxomicin	-6.10072
N-Pyridoxyl-Glycine-5-Monophosphate	-6.10023
Ketoprofen	-6.07876
Acetyl sulfisoxazole	-6.07589
Sodium phosphate, monobasic	-6.06878
Liothyronine	-6.06868
scyllo-inositol	-6.05347
Acalabrutinib	-6.03713
Isoniazid	-6.02149
Acetohydroxamic acid	-6.01707
Astemizole	-6.00927
Clindamycin	-6.00836
Dapsone	-5.98296
Emtricitabine	-5.97311
Lamivudine	-5.9698
Basiliximab	-5.96344
Gestodene	-5.95646
Epibatidine	-5.95351
Methoxyflurane	-5.95304
Lomefloxacin	-5.93733
(1,10 Phenanthroline)-(Tri-Carbon Monoxide) Rhenium (I)	-5.9327
GM6001	-5.93234
Doxorubicin	-5.92353
Norfloxacin	-5.92208
Altretamine	-5.90576
(R)-1-Para-Nitro-Phenyl-2-Azido-Ethanol	-5.90304
Eftrenonacog alfa	-5.89802
Halothane	-5.89087
Rimonabant	-5.88749
Clobazam	-5.8838
Terazosin	-5.88261
Etanercept	-5.86968
Ertugliflozin	-5.85789
Tocopherol	-5.85035
Cefixime	-5.84748
Niflumic acid	-5.83983
Estradiol dienanthate	-5.83817
Eravacycline	-5.83267
Spermidine	-5.83239
1-{2-[2-(2-Methoxyethoxy)Ethoxy]Ethoxy}-4-(1,1,3,3-Tetramethylbutyl)Benzene	-5.82407
CTA018	-5.81276
Cholestyramine	-5.79665
Ciclosporin	-5.78572
Iloprost	-5.75595
Sulfisoxazole	-5.73715
Armodafinil	-5.72604
Estradiol	-5.721
Estradiol acetate	-5.71933
N-Acetyl-D-Allosamine	-5.71853
Sulfamethizole	-5.70456
1-DODECANOL	-5.70005
Vincristine	-5.69702
Cyclandelate	-5.69222
Dihydrolipoic Acid	-5.69039
Bentoquatam	-5.69005
Sorafenib	-5.68958
Efavirenz	-5.68916
Vicriviroc	-5.68067
Leukotriene C4	-5.68053
Ofloxacin	-5.66275
Simeprevir	-5.64746
D-Lactic acid	-5.64673
Asparagine	-5.64667
Formycin	-5.62728
Strontium chloride Sr-89	-5.61924
Cefuroxime	-5.57629
Metamizole	-5.57622
Calcitriol	-5.55939
Artesunate	-5.54553
Succinylcholine	-5.54493
Biliverdine IX Alpha	-5.52453
Oxamic Acid	-5.51312
Trastuzumab	-5.50793
Gentamicin	-5.49817
beta-D-fructofuranose 1,6-bisphosphate	-5.49527
BUTETHAL	-5.49454
Apixaban	-5.48283
Dihydrogenphosphate	-5.45631
Salmeterol	-5.45147
Abemaciclib	-5.44581
Chloroquine	-5.40844
N-(pyridin-3-ylmethyl)aniline	-5.4
Brinzolamide	-5.39866
Levothyroxine	-5.38411
Estradiol benzoate	-5.38382
Fluoxetine	-5.37722
7-AMINO-4-METHYL-CHROMEN-2-ONE	-5.37479
Ethoxzolamide	-5.355
Cisapride	-5.32955
Romidepsin	-5.32754
Etravirine	-5.32116
Ivermectin	-5.31849
Raltegravir	-5.31644
Enflurane	-5.30844
Niraparib	-5.30783
Baricitinib	-5.29893
SC-74020	-5.29809
Acetic acid	-5.29694
Estradiol cypionate	-5.28518
Heptabarbital	-5.27626
Oxymetholone	-5.27358
Nefazodone	-5.25992
Perindopril	-5.25736
Streptomycin	-5.2538
Ledipasvir	-5.22325
Sertraline	-5.19847
Primidone	-5.183
Paclitaxel	-5.17658
Di(N-Acetyl-D-Glucosamine)	-5.17462
Nateglinide	-5.15859
Pregabalin	-5.15385
Glyburide	-5.15163
Trivanadate	-5.14498
Ivacaftor	-5.14112
Diminazene	-5.1301
Varenicline	-5.12595
Acarbose Derived Hexasaccharide	-5.11887
Danazol	-5.11621
Amifostine	-5.1145
Tenofovir alafenamide	-5.11057
1-[(2S)-2-[(4-CHLOROBENZYL)OXY]-2-(2,4-DICHLOROPHENYL)ETHYL]-1H-IMIDAZOLE	-5.10292
Piroxicam	-5.10093
L-Valine	-5.08727
S-(Methylmercury)-L-Cysteine	-5.08093
Sulfamethoxazole	-5.08034
Lovastatin	-5.05765
Ginkgo biloba	-5.03941
Ademetionine	-5.03473
Verapamil	-5.03183
9-Methylguanine	-5.02524
Technetium Tc-99m ciprofloxacin	-5.01969
Nicardipine	-5.01782
1-((2-HYDROXYETHOXY)METHYL)-5-BENZYLPYRIMIDINE-2,4(1H,3H)-DIONE	-5.01331
Sertaconazole	-5.0122
Flumazenil	-5.01029
Prostaglandin D2	-5.00321
Ifosfamide	-4.99607
Micafungin	-4.99467
Dextrothyroxine	-4.99437
Estrone	-4.99414
D-Phenylalanine	-4.97664
Butabarbital	-4.97383
Hexachlorophene	-4.96505
Magnesium carbonate	-4.96384
Amobarbital	-4.95544
Levomefolic acid	-4.9523
Butobarbital	-4.93263
Uracil mustard	-4.92759
Rilpivirine	-4.92468
Lanoteplase	-4.91844
Zalcitabine	-4.90261
Evening primrose oil	-4.89574
Darunavir	-4.88843
Seletracetam	-4.87303
Temocapril	-4.86036
Digoxin	-4.84319
Thiamine	-4.83385
Aprobarbital	-4.83113
Hesperetin	-4.80444
Polaprezinc	-4.80114
Butalbital	-4.79097
Hydroxyprogesterone caproate	-4.78356
Atazanavir	-4.78331
Phenobarbital	-4.77984
Fenofibric acid	-4.77952
Ethylmorphine	-4.7762
5'-Deoxy-5'-Methylthioadenosine	-4.77499
Eplerenone	-4.77361
Fluoxymesterone	-4.77245
Captopril	-4.77158
Calcium Phosphate	-4.75836
Beta-Alanine	-4.73997
Ezogabine	-4.73276
Crisaborole	-4.72742
N-Omega-Hydroxy-L-Arginine	-4.72547
Mycophenolate mofetil	-4.72201
Luliconazole	-4.70574
Ombitasvir	-4.70561
Pentolinium	-4.69691
Metharbital	-4.69588
Temsirolimus	-4.69138
Alfentanil	-4.6912
Naproxen	-4.68983
Lucinactant	-4.6819
Barbital	-4.68187
alpha-maltotriose	-4.67962
Gallium nitrate	-4.66483
Cerivastatin	-4.65265
Ponatinib	-4.65088
Lopinavir	-4.64677
Ketoconazole	-4.64597
Amantadine	-4.61386
Erlotinib	-4.61354
Benazepril	-4.61185
Uridine	-4.59497
Netupitant	-4.58809
PG-530742	-4.57792
3,5-Diiodotyrosine	-4.57658
N,4-Dihydroxy-N-Oxo-3-(Sulfooxy)Benzenaminium	-4.5741
3ar,5r,6s,7r,7ar-5-Hydroxymethyl-2-Methyl-5,6,7,7a-Tetrahydro-3ah-Pyrano[3,2-D]Thiazole-6,7-Diol	-4.57125
Anthranilic acid	-4.57063
Dinoprost tromethamine	-4.56029
Cacodylic acid	-4.55643
Norethisterone	-4.53832
2'-Deoxycytidine	-4.53495
Terfenadine	-4.53205
Dabrafenib	-4.53086
Flurbiprofen	-4.52599
Vardenafil	-4.52408
Imatinib	-4.49706
Flucloxacillin	-4.49255
Halofantrine	-4.47485
Edetate disodium anhydrous	-4.45579
Talbutal	-4.4484
Dexloxiglumide	-4.43802
Amelubant	-4.42911
Simvastatin	-4.42644
Sarilumab	-4.4232
Mifepristone	-4.40283
1,4-Diethylene Dioxide	-4.40161
Methazolamide	-4.38793
Phosphonothreonine	-4.38502
Palifermin	-4.38387
Cholesterol	-4.38341
Foscarnet	-4.38184
Tinzaparin	-4.37817
Alprazolam	-4.37626
Oxycodone	-4.37549
Budesonide	-4.37214
Cilazapril	-4.36837
Permethrin	-4.3585
Lormetazepam	-4.35167
Barbituric acid derivative	-4.35041
Ropivacaine	-4.34689
Calcium phosphate dihydrate	-4.34008
Nitrofural	-4.33206
Candesartan	-4.2987
Metamfetamine	-4.29079
Cystine	-4.28793
Ibrutinib	-4.27963
GAMMA HYDROXYBUTYRIC ACID	-4.27328
Vitamin A	-4.27177
Timolol	-4.26875
(2R)-2-AMINO-3,3,3-TRIFLUORO-N-HYDROXY-2-{[(4-PHENOXYPHENYL)SULFONYL]METHYL}PROPANAMIDE	-4.25775
2-{[Formyl(Hydroxy)Amino]Methyl}-4-Methylpentanoic Acid	-4.2549
Biricodar	-4.24767
Ubenimex	-4.24701
Tramadol	-4.2442
Fluconazole	-4.2218
Piracetam	-4.21603
AE-941	-4.20934
D-Alanine	-4.20124
Candesartan cilexetil	-4.19883
5-(4-PHENOXYPHENYL)-5-(4-PYRIMIDIN-2-YLPIPERAZIN-1-YL)PYRIMIDINE-2,4,6(2H,3H)-TRIONE	-4.1972
Endostatin	-4.17166
Lorazepam	-4.1694
Seproxetine	-4.14535
5-Mercapto-2-Nitro-Benzoic Acid	-4.14367
Foreskin keratinocyte (neonatal)	-4.13732
Vintafolide	-4.12635
2'-Deoxyuridine 3'-Monophosphate	-4.12632
Telcagepant	-4.12408
Curcumin sulfate	-4.11149
Ataluren	-4.10983
Serine	-4.10306
Dextromethorphan	-4.10035
Baloxavir marboxil	-4.08434
Pyrantel	-4.06866
Buspirone	-4.06357
Lenvatinib	-4.05149
Tirofiban	-4.04842
Regorafenib	-4.03755
Magnesium gluconate	-4.02496
Purvalanol	-4.02041
Tipranavir	-4.0147
Fluorouracil	-4.01295
Celecoxib	-4.01295
Glucosamine	-4.00863
Leflunomide	-3.99944
alpha-D-mannose 6-phosphate	-3.9849
Diclofenac	-3.96515
Moexipril	-3.96224
Amoxicillin	-3.9601
Ambrisentan	-3.95886
Leukotriene B4	-3.95658
Nifedipine	-3.94068
Hydrocortisone succinate	-3.9232
Azelastine	-3.92227
Alpha-Hydroxy-Beta-Phenyl-Propionic Acid	-3.91351
Phenelzine	-3.90613
Lefradafiban	-3.88239
Curcumin	-3.88107
Lapatinib	-3.87471
Hydromorphone	-3.86596
Fenproporex	-3.85661
Lamotrigine	-3.85001
Benzphetamine	-3.8495
Tolbutamide	-3.84813
Amlodipine	-3.8311
Phenytoin	-3.82456
(3R)-4,4-DIFLUORO-3-[(4-METHOXYPHENYL)SULFONYL]BUTANOIC ACID	-3.82298
Fosinopril	-3.81641
Rufinamide	-3.80661
Telithromycin	-3.79384
Econazole	-3.78899
S-Hexylglutathione	-3.7859
Alitretinoin	-3.77261
Allopurinol	-3.77175
Asenapine	-3.77093
Fradafiban	-3.77087
Isradipine	-3.76595
Glycocholic acid	-3.76485
Nedocromil	-3.7641
Didanosine	-3.75949
Avatrombopag	-3.75799
Irbesartan	-3.74933
Dexlansoprazole	-3.74629
Latanoprost	-3.74509
Cinoxacin	-3.73434
Argifin	-3.7289
Antihemophilic Factor (Recombinant), PEGylated	-3.70554
Malonate Ion	-3.69963
Androstenedione	-3.69129
Grazoprevir	-3.68627
Dexamethasone	-3.68221
Enzalutamide	-3.67552
Carboplatin	-3.67456
Enfuvirtide	-3.65523
MITOMYCIN-C	-3.65396
gamma-Hydroxybutyric acid	-3.64966
Isoprenaline	-3.64189
Phenethyl Isothiocyanate	-3.64024
Disulfiram	-3.63569
Uridine triacetate	-3.63525
Von Willebrand Factor Human	-3.63423
Loratadine	-3.62529
Lacosamide	-3.61977
N-[3-(N'-HYDROXYCARBOXAMIDO)-2-(2-METHYLPROPYL)-PROPANOYL]-O-TYROSINE-N-METHYLAMIDE	-3.61385
Choline salicylate	-3.61377
Metronidazole	-3.60439
Triclocarban	-3.60006
Gilteritinib	-3.59777
Oxcarbazepine	-3.59644
Progesterone	-3.58961
Levacetylmethadol	-3.58321
(2S)-4-METHYL-2-(3-PHENYLTHIOUREIDO)-N-((3S)-TETRAHYDRO-2-HYDROXY-3-FURANYL)PENTANAMIDE	-3.57537
Cidofovir	-3.57459
Ketazolam	-3.57379
Lercanidipine	-3.56933
Tenecteplase	-3.56641
Felodipine	-3.55633
Atovaquone	-3.55397
Zaleplon	-3.55329
Brivaracetam	-3.54978
5-[(3R)-3-(5-methoxy-2',6'-dimethylbiphenyl-3-yl)but-1-yn-1-yl]-6-methylpyrimidine-2,4-diamine	-3.54802
Cocaine	-3.54595
Piperaquine	-3.53983
Fosphenytoin	-3.53299
Argadin	-3.51433
Trandolapril	-3.51141
XL999	-3.51099
Hyaluronidase (ovine)	-3.49599
Dofetilide	-3.48644
Riboflavin	-3.47475
Oxaliplatin	-3.47265
Muraglitazar	-3.47187
Levodopa	-3.4691
Levomilnacipran	-3.46414
Kifunensine	-3.45103
Carbenicillin	-3.45011
Mitiglinide	-3.44181
Resveratrol	-3.42603
CICLOSPORIN	-3.4193
Sulfanilamide	-3.41604
Secobarbital	-3.4149
Clomethiazole	-3.40613
Morphine	-3.39336
Deutetrabenazine	-3.39116
Choline	-3.38739
Gabapentin	-3.38405
Clopidogrel	-3.37624
Vorhyaluronidase alfa	-3.37054
Trimethaphan	-3.3436
Vonicog Alfa	-3.33147
Foreskin fibroblast (neonatal)	-3.32609
2-Amino-N,3,3-Trimethylbutanamide	-3.31946
Dovitinib	-3.31916
Cabazitaxel	-3.31482
Sargramostim	-3.31283
2-Methyl-2-Propanol	-3.31149
Thiopental	-3.30706
Naldemedine	-3.30381
R1295	-3.29879
Rubidium Rb-82	-3.29814
Fentanyl	-3.29181
2-[3-(5-MERCAPTO-[1,3,4]THIADIAZOL-2YL)-UREIDO]-N-METHYL-3-PENTAFLUOROPHENYL-PROPIONAMIDE	-3.28339
Quinidine	-3.28203
(2S)-2-(3-bromophenyl)-3-(5-chloro-2-hydroxyphenyl)-1,3-thiazolidin-4-one	-3.27783
Nalmefene	-3.27443
Ouabain	-3.26584
Fructose-6-Phosphate	-3.26456
Carisoprodol	-3.26263
Magnesium sulfate	-3.25255
Digitoxin	-3.24951
LM-609	-3.24219
Piritrexim	-3.24137
Pentobarbital	-3.22664
Ferumoxytol	-3.22092
Nintedanib	-3.21548
Mecamylamine	-3.21421
Omega-3-carboxylic acids	-3.20881
Voxilaprevir	-3.20738
Eszopiclone	-3.20717
Iclaprim	-3.20141
Dalfampridine	-3.19581
Mesalazine	-3.19325
Fluvoxamine	-3.1873
Ethinylestradiol	-3.18622
Esketamine	-3.18368
Eptifibatide	-3.18137
Trifluridine	-3.18047
MMDA	-3.17373
Aminosalicylic Acid	-3.17313
Anistreplase	-3.17277
Lumacaftor	-3.16666
L-Arginine	-3.16584
Thiabendazole	-3.16432
Sri-9662	-3.15805
Pranlukast	-3.15688
Vedolizumab	-3.14493
Streptokinase	-3.13995
4-Oxosebacic Acid	-3.13538
Aprepitant	-3.13463
Chloroprocaine	-3.13239
Imidafenacin	-3.1274
Alteplase	-3.12699
Vandetanib	-3.10957
Reteplase	-3.10215
Dorzolamide	-3.10213
Fenofibrate	-3.09407
Iron Dextran	-3.08245
Flavone	-3.08082
Serotonin	-3.07914
Nicotinamide	-3.07441
Latrunculin A	-3.04755
Trimetrexate	-3.04685
Protoporphyrin	-3.03719
TRC093	-3.03242
Sucralfate	-3.03238
[[1-[N-HYDROXY-ACETAMIDYL]-3-METHYL-BUTYL]-CARBONYL-LEUCINYL]-ALANINE ETHYL ESTER	-3.02836
Nitric Oxide	-3.0179
Pimozide	-3.01292
Rifaximin	-3.01243
Isavuconazole	-3.00203
Dronedarone	-3.00133
Trazodone	-2.99683
Ketamine	-2.98964
Denibulin	-2.98735
CBZ-LEU-LEU-TYR-CH2F	-2.98068
Acitretin	-2.97785
(2R,6S)-6-{[methyl(3,4,5-trimethoxyphenyl)amino]methyl}-1,2,5,6,7,8-hexahydroquinazoline-2,4-diamine	-2.97245
Raloxifene	-2.96774
Deferasirox	-2.95708
Hexobarbital	-2.95695
N-HYDROXY-2-[4-(4-PHENOXY-BENZENESULFONYL)-TETRAHYDRO-PYRAN-4-YL]-ACETAMIDE	-2.95574
Calcium	-2.95438
2,4-Diamino-5-Methyl-6-[(3,4,5-Trimethoxy-N-Methylanilino)Methyl]Pyrido[2,3-D]Pyrimidine	-2.95366
Glycyrrhizic acid	-2.94763
Axitinib	-2.94713
Isoleucine	-2.94594
Prasterone	-2.94512
Pegpleranib	-2.94335
Hydroxyaminovaline	-2.94221
2,4-Diamino-6-[N-(3',5'-Dimethoxybenzyl)-N-Methylamino]Pyrido[2,3-D]Pyrimidine	-2.94102
Elaidoylamide	-2.93875
N-[2-(2-methyl-1H-indol-3-yl)ethyl]thiophene-2-carboxamide	-2.93545
Nilotinib	-2.91611
Chlorphenamine	-2.91606
Putrescine	-2.91585
GTS-21	-2.91411
UDP-alpha-D-glucuronic acid	-2.91037
Dasatinib	-2.9002
Becaplermin	-2.89964
Mitoxantrone	-2.89886
Caspofungin	-2.89754
[N-(2,4-DIAMINOPTERIDIN-6-YL)-METHYL]-DIBENZ[B,F]AZEPINE	-2.89541
CTCE-0214	-2.88889
Teriflunomide	-2.88726
IMC-1C11	-2.87842
Epinastine	-2.87357
Orphenadrine	-2.86942
Amitriptyline	-2.8637
Metyrapone	-2.86199
Bivatuzumab	-2.85691
2,3,5,6-Tetrafluoro-4-Methoxy-Benzamide	-2.85654
Calcium Citrate	-2.84781
Ocriplasmin	-2.84532
Glutathione Sulfonic Acid	-2.84283
Ganaxolone	-2.83991
Anti-inhibitor coagulant complex	-2.83807
5-fluorouridine	-2.83483
Ferric pyrophosphate citrate	-2.83467
6-Phenyl-4(R)-(7-Phenyl-Heptanoylamino)-Hexanoic Acid	-2.83386
Doxazosin	-2.83131
Lonafarnib	-2.82745
Thiotepa	-2.82415
Mexiletine	-2.82248
ABT-869	-2.81761
5-[(3R)-3-(5-methoxy-4'-methylbiphenyl-3-yl)but-1-yn-1-yl]-6-methylpyrimidine-2,4-diamine	-2.81075
(1-Benzyl-5-methoxy-2-methyl-1H-indol-3-yl)acetic acid	-2.80752
Eltrombopag	-2.79914
Sri-9439	-2.78788
N6-(2,5-Dimethoxy-Benzyl)-N6-Methyl-Pyrido[2,3-D]Pyrimidine-2,4,6-Triamine	-2.78426
Acetaminophen	-2.78071
[2-(5-MERCAPTO-[1,3,4]THIADIAZOL-2-YLCARBAMOYL)-1-PHENYL-ETHYL]-CARBAMIC ACID BENZYL ESTER	-2.77331
R-2-{[4'-Methoxy-(1,1'-Biphenyl)-4-Yl]-Sulfonyl}-Amino-6-Methoxy-Hex-4-Ynoic Acid	-2.7723
Urokinase	-2.7612
Thionicotinamide-Adenine-Dinucleotide	-2.74568
[4-(4-PHENYL-PIPERIDIN-1-YL)-BENZENESULFONYLAMINO]-ACETIC ACID	-2.73937
Spirapril	-2.73636
Cimicifuga racemosa	-2.73256
S-Methylcysteine	-2.72063
R411	-2.7206
Cyclothiazide	-2.71532
L-Alanine	-2.71442
ATL1102	-2.70893
Lansoprazole	-2.70581
L-Threonine	-2.70497
ABT-510	-2.70311
PN0621	-2.6983
Vatalanib	-2.69808
CDP323	-2.69155
2,4-Diamino-6-[N-(2',5'-Dimethoxybenzyl)-N-Methylamino]Quinazoline	-2.69113
(1n)-4-N-Butoxyphenylsulfonyl-(2r)-N-Hydroxycarboxamido-(4s)-Methanesulfonylamino-Pyrrolidine	-2.68964
3-[(4'-cyanobiphenyl-4-yl)oxy]-N-hydroxypropanamide	-2.67732
Golimumab	-2.67256
Ospemifene	-2.66727
2,4-Diamino-6-[N-(3',4',5'-Trimethoxybenzyl)-N-Methylamino]Pyrido[2,3-D]Pyrimidine	-2.66572
1-Methyloxy-4-Sulfone-Benzene	-2.66543
3-(1h-Indol-3-Yl)-2-[4-(4-Phenyl-Piperidin-1-Yl)-Benzenesulfonylamino]-Propionic Acid	-2.66295
Losartan	-2.6594
Acetylcholine	-2.65585
Tetrathiomolybdate	-2.65428
TG-100801	-2.65212
N-Hydroxy 1n(4-Methoxyphenyl)Sulfonyl-4-(Z,E-N-Methoxyimino)Pyrrolidine-2r-Carboxamide	-2.64875
Nortriptyline	-2.64679
Flutemetamol (18F)	-2.64617
Telmisartan	-2.6345
Aminolevulinic acid	-2.63033
Edonerpic	-2.62938
3-Methylpyridine	-2.61786
Mecasermin	-2.61489
N-[[2-METHYL-4-HYDROXYCARBAMOYL]BUT-4-YL-N]-BENZYL-P-[PHENYL]-P-[METHYL]PHOSPHINAMID	-2.61064
(4aS)-5-[(2,4-diaminopteridin-6-yl)methyl]-4a,5-dihydro-2H-dibenzo[b,f]azepin-8-ol	-2.60339
Paliperidone	-2.60325
Iloperidone	-2.6028
Carbamazepine	-2.60003
Gavestinel	-2.59565
(S)-5-(4-Benzyloxy-Phenyl)-4-(7-Phenyl-Heptanoylamino)-Pentanoic Acid	-2.59205
Riociguat	-2.58757
Dalteparin	-2.58001
Loperamide	-2.57755
4-(1-Benzyl-3-Carbamoylmethyl-2-Methyl-1h-Indol-5-Yloxy)-Butyric Acid	-2.56861
2-(2-{2-[(BIPHENYL-4-YLMETHYL)-AMINO]-3-MERCAPTO-PENTANOYLAMINO}-ACETYLAMINO)-3-METHYL-BUTYRIC ACID METHYL ESTER	-2.56658
Tyrosine	-2.55697
Valdecoxib	-2.54291
EP-2104R	-2.53608
Sulpiride	-2.53147
4-[(10s,14s,18s)-18-(2-Amino-2-Oxoethyl)-14-(1-Naphthylmethyl)-8,17,20-Trioxo-7,16,19-Triazaspiro[5.14]Icos-11-En-10-Yl]Benzylphosphonic Acid	-2.52433
1-Benzyl-3-(4-Methoxy-Benzenesulfonyl)-6-Oxo-Hexahydro-Pyrimidine-4-Carboxylic Acid Hydroxyamide	-2.52322
5-Alpha-Androstane-3-Beta,17-Alpha-Diol	-2.52181
Cilostazol	-2.51743
Andexanet alfa	-2.5095
Bupropion	-2.50649
XL820	-2.50614
Pegademase	-2.50462
Plinabulin	-2.49291
Talniflumate	-2.489
5-Methyl-5-(4-Phenoxy-Phenyl)-Pyrimidine-2,4,6-Trione	-2.48505
[3-(1-Benzyl-3-Carbamoylmethyl-2-Methyl-1h-Indol-5-Yloxy)-Propyl-]-Phosphonic Acid	-2.4833
N~2~-(biphenyl-4-ylsulfonyl)-N-hydroxy-N~2~-(2-hydroxyethyl)glycinamide	-2.48171
Chloroxine	-2.47684
2-[3-(5-MERCAPTO-[1,3,4]THIADIAZOL-2-YL)-UREIDO]-N-METHYL-3-PHENYL-PROPIONAMIDE	-2.46976
1-Octadecyl-2-Acetamido-2-Deoxy-Sn-Glycerol-3-Phosphoethylmethyl Sulfide	-2.46406
Canagliflozin	-2.46365
A Disubstituted Succinyl Caprolactam Hydroxymate Mmp3inhibitor	-2.44878
6-(Octahydro-1h-Indol-1-Ylmethyl)Decahydroquinazoline-2,4-Diamine	-2.4424
Streptozocin	-2.4373
Filgrastim	-2.43117
Mito-4509	-2.41495
Suramin	-2.41317
PR-104	-2.41222
Manidipine	-2.39579
alpha-Tocopherol succinate	-2.39193
Ancrod	-2.3915
Ixazomib	-2.3905
Diiodohydroxyquinoline	-2.38702
Gallium citrate Ga 67	-2.37535
Tesevatinib	-2.37367
Silver	-2.36978
Thrombin	-2.36926
Caplacizumab	-2.36875
Efmoroctocog alfa	-2.35693
[1-(4-Fluorobenzyl)Cyclobutyl]Methyl (1s)-1-[Oxo(1h-Pyrazol-5-Ylamino)Acetyl]Pentylcarbamate	-2.35594
4'-Hydroxyflavanone	-2.35528
Insulin Pork	-2.35478
Gabexate	-2.35338
Buprenorphine	-2.35291
CYCLOHEXYLMETHYL-2,3-DIHYDROXY-5-METHYL-HEXYLAMIDE	-2.34572
Irofulven	-2.3372
Gefitinib	-2.33286
9-CYCLOPENTYL-6-[2-(3-IMIDAZOL-1-YL-PROPOXY)-PHENYLAMINO]-9H-PURINE-2-CARBONITRILE	-2.32583
5-AMINO-6-CYCLOHEXYL-4-HYDROXY-2-ISOBUTYL-HEXANOIC ACID	-2.32344
Florbetapir (18F)	-2.32317
Aluminum acetate	-2.32206
3-Phenylpropylamine	-2.32183
Dimercaprol	-2.31969
Egaptivon pegol	-2.31692
Ethyl pyruvate	-2.31455
KX-01	-2.30722
Desmoteplase	-2.30648
Quinacrine	-2.30003
Cytarabine	-2.2984
N-Hydroxy-1-(4-Methoxyphenyl)Sulfonyl-4-Benzyloxycarbonyl-Piperazine-2-Carboxamide	-2.29678
N,O6-Disulfo-Glucosamine	-2.29081
Histidine	-2.29009
(1R)-N,6-DIHYDROXY-7-METHOXY-2-[(4-METHOXYPHENYL)SULFONYL]-1,2,3,4-TETRAHYDROISOQUINOLINE-1-CARBOXAMIDE	-2.28284
BIS-1,2-{[(Z)-2CARBOXY-2-METHYL-1,3-DIOXANE]-5-YLOXYCARBONYL}-PIPERAZINE	-2.28084
CAD106	-2.28029
CYT007-TNFQb	-2.27514
Adalimumab	-2.27337
Dexanabinol	-2.26658
3-[(3-(2-CARBOXYETHYL)-4-METHYLPYRROL-2-YL)METHYLENE]-2-INDOLINONE	-2.2646
Onercept	-2.26156
Dasabuvir	-2.26084
N-Hydroxy-4-[(4-Methoxylphenyl)Sulfonyl]-2,2-Dimethyl-Hexahydro-1,4-Thiazepine-3(S)-Carboxamide	-2.25829
Veglin	-2.25078
Bevasiranib	-2.2494
D-alpha-Tocopherol acetate	-2.24898
METHYLAMINO-PHENYLALANYL-LEUCYL-HYDROXAMIC ACID	-2.24464
Equol	-2.2426
Tetrachlorodecaoxide	-2.2327
Adenosine-2'-5'-Diphosphate	-2.22698
Lancovutide	-2.22474
Zopiclone	-2.22339
Etretinate	-2.2155
1,4-Dideoxy-5-Dehydro-O2-Sulfo-Glucuronic Acid	-2.21446
N4-HYDROXY-2-ISOBUTYL-N1-(9-OXO-1,8-DIAZA-TRICYCLO[10.6.1.013,18]NONADECA-12(19),13,15,17-TETRAEN-10-YL)-SUCCINAMIDE	-2.20592
Prothrombin	-2.20204
AME-527	-2.20153
Relacatib	-2.19997
Salmon Calcitonin	-2.19981
Susoctocog alfa	-2.19863
Pegfilgrastim	-2.19756
Simoctocog alfa	-2.19675
Afelimomab	-2.18843
(E)-[4-(3,5-difluorophenyl)-3H-pyrrolo[2,3-b]pyridin-3-ylidene](3-methoxyphenyl)methanol	-2.18442
N-Aminoethylmorpholine	-2.17412
Diltiazem	-2.17358
L-Cysteine	-2.17223
1h-Benoximidazole-2-Carboxylic Acid	-2.17083
4-Iodopyrazole	-2.15995
RISEDRONATE	-2.15885
Phosphoaminophosphonic Acid Guanylate Ester	-2.15424
N-HYDROXY-2(R)-[[(4-METHOXYPHENYL)SULFONYL](3-PICOLYL)AMINO]-3-METHYLBUTANAMIDE HYDROCHLORIDE	-2.15389
5-Alpha-Androstane-3-Beta,17beta-Diol	-2.15349
1,4-Dideoxy-O2-Sulfo-Glucuronic Acid	-2.14045
(1R,2R)-N-(2-Aminoethyl)-2-{[(4-methoxyphenyl)sulfonyl]methyl}cyclohexanecarboxamide	-2.14001
3-(3-methoxybenzyl)-1H-pyrrolo[2,3-b]pyridine	-2.13905
SU4984	-2.13803
Ferric pyrophosphate	-2.13766
RU81843	-2.11759
(2R)-2-(3-Biphenylyl)-N-{(2R)-2-hydroxy-3-[(2-pyridinylsulfonyl)amino]propyl}-4-methylpentanamide	-2.11558
Alfimeprase	-2.11207
BIS-1,2-{[(Z)-2-CARBOXY-2-METHYL-1,3-DIOXANE]-5-YLOXYCARBAMOYL}-ETHANE	-2.11042
Benzofuran-2-Carboxylic Acid {(S)-3-Methyl-1-[3-Oxo-1-(Pyridin-2-Ylsulfonyl)Azepan-4-Ylcarbamoyl]Butyl}Amide	-2.10373
Perphenazine	-2.09995
LAX-101	-2.09955
Darapladib	-2.09716
Infliximab	-2.09426
Bacitracin	-2.08816
Methyl 4,6-O-[(1R)-1-carboxyethylidene]-beta-D-galactopyranoside	-2.07631
Tert-Butyl(1s)-1-Cyclohexyl-2-Oxoethylcarbamate	-2.07127
RU82209	-2.06699
N-(2-AMINOETHYL)-N~2~-{(1S)-1-[4'-(AMINOSULFONYL)BIPHENYL-4-YL]-2,2,2-TRIFLUOROETHYL}-L-LEUCINAMIDE	-2.06495
Depatuxizumab mafodotin	-2.05925
Erdafitinib	-2.05623
Promethazine	-2.05566
Thrombin alfa	-2.04603
1-(PHENYLMETHYL)CYCLOPENTYL[(1S)-1-FORMYLPENTYL]CARBAMATE	-2.04218
N-cyclopropyl-6-[(6,7-dimethoxyquinolin-4-yl)oxy]naphthalene-1-carboxamide	-2.03973
Phenylbutazone	-2.03841
Risperidone	-2.03709
Seratrodast	-2.03688
Rindopepimut	-2.03621
RU83876	-2.03535
4-[[2-[[4-chloro-3-(trifluoromethyl)phenyl]amino]-3H-benzimidazol-5-yl]oxy]-N-methyl-pyridine-2-carboxamide	-2.03458
1,5-Bis(N-Benzyloxycarbonyl-L-Leucinyl)Carbohydrazide	-2.03351
TERT-BUTYL 2-CYANO-2-METHYLHYDRAZINECARBOXYLATE	-2.02999
N2-({[(4-Bromophenyl)Methyl]Oxy}Carbonyl)-N1-[(1s)-1-Formylpentyl]-L-Leucinamide	-2.02995
N-(4-CHLOROPHENYL)-3-(PHOSPHONOOXY)NAPHTHALENE-2-CARBOXAMIDE	-2.02601
Norepinephrine	-2.02281
Sodium ferric gluconate complex	-2.01485
1-{7-cyclohexyl-6-[4-(4-methylpiperazin-1-yl)benzyl]-7H-pyrrolo[2,3-d]pyrimidin-2-yl}methanamine	-2.0084
Maltosyl-Alpha (1,4)-D-Gluconhydroximo-1,5-Lactam	-1.99724
Ranibizumab	-1.99561
5-fluorotryptophan	-1.98999
Aluminium	-1.98587
Benzbromarone	-1.98486
Thalidomide	-1.97736
5-(DIMETHYLAMINO)-2-NAPHTHALENESULFONIC ACID	-1.97715
Gemfibrozil	-1.97667
5-METHYL-3-(9-OXO-1,8-DIAZA-TRICYCLO[10.6.1.013,18]NONADECA-12(19),13,15,17-TETRAEN-10-YLCARBAMOYL)-HEXANOIC ACID	-1.97581
Amrinone	-1.97379
(1R,2R,3S,4R,6S)-3,4,6-Trihydroxy-5-{[(S)-hydroxy(3-hydroxy-2-oxopropoxy)phosphoryl]oxy}-1,2-cyclohexanediyl bis[dihydrogen (phosphate)]	-1.97292
N2-[(benzyloxy)carbonyl]-n1-[(3S)-1-cyanopyrrolidin-3-yl]-l-leucinamide	-1.97279
4,6-Dideoxy-4-{[4,5,6-Trihydroxy-3-(Hydroxymethyl)Cyclohex-2-En-1-Yl]Amino}-Alpha-D-Lyxo-Hexopyranosyl-(1->4)-Alpha-D-Threo-Hexopyranosyl-(1->6)-Alpha-L-Threo-Hexopyranose	-1.96989
N-(4-phenoxyphenyl)-2-[(pyridin-4-ylmethyl)amino]nicotinamide	-1.96984
AV-412	-1.96879
(2R)-3-Methyl-1-phenyl-2-butanyl [(2S)-1-oxo-2-hexanyl]carbamate	-1.96393
RU82129	-1.96089
Tioconazole	-1.95377
Sphinxolide B	-1.95059
Pitolisant	-1.94408
Antihemophilic factor, human recombinant	-1.94384
1-cyclobutyl-3-(3,4-dimethoxyphenyl)-1H-pyrazolo[3,4-d]pyrimidin-4-amine	-1.94135
Pralatrexate	-1.93528
Talmapimod	-1.929
Trencam-3,2-Hopo	-1.92778
2-[({4-[2-(trifluoromethyl)phenyl]piperidin-1-yl}carbonyl)amino]benzoic acid	-1.92766
Canertinib	-1.92411
Tmr	-1.91943
Dilmapimod	-1.91912
N'-(5-CHLORO-1,3-BENZODIOXOL-4-YL)-N-(3-MORPHOLIN-4-YLPHENYL)PYRIMIDINE-2,4-DIAMINE	-1.91912
RU78783	-1.91403
Triethylenetetramine	-1.90906
Dutasteride	-1.90473
N~4~-methyl-N~4~-(3-methyl-1H-indazol-6-yl)-N~2~-(3,4,5-trimethoxyphenyl)pyrimidine-2,4-diamine	-1.90315
Bis-Napthyl Beta-Ketophosphonic Acid	-1.90109
Rose bengal free acid	-1.90059
Amuvatinib	-1.90011
N-(4-PHENYLAMINO-QUINAZOLIN-6-YL)-ACRYLAMIDE	-1.88822
4,4'-BIS([H]METHYLSULFONYL)-2,2',5,5'-TETRACHLOROBIPHENYL	-1.88092
Carboxymycobactin T	-1.87446
N'-(5-chloro-1,3-benzodioxol-4-yl)-N-(3-methylsulfonylphenyl)pyrimidine-2,4-diamine	-1.86978
Necitumumab	-1.85729
Safinamide	-1.85587
6-(cyclohexylamino)-9-[2-(4-methylpiperazin-1-yl)-ethyl]-9H-purine-2-carbonitrile	-1.85513
Carboxymycobactin S	-1.85402
N-(5-chloro-1,3-benzodioxol-4-yl)-6-methoxy-7-(3-piperidin-1-ylpropoxy)quinazolin-4-amine	-1.85356
Cediranib	-1.85264
Phenylphosphate	-1.85258
DPI59	-1.8488
N-[4-(3-BROMO-PHENYLAMINO)-QUINAZOLIN-6-YL]-ACRYLAMIDE	-1.84499
N~4~-(3-methyl-1H-indazol-6-yl)-N~2~-(3,4,5-trimethoxyphenyl)pyrimidine-2,4-diamine	-1.83904
IGN311	-1.8314
Pelitinib	-1.82965
N2-[(Benzyloxy)carbonyl]-N-[(3R)-1-{N-[(benzyloxy)carbonyl]-L-leucyl}-4-oxo-3-pyrrolidinyl]-L-leucinamide	-1.8284
Atiprimod	-1.82382
SR-123781A	-1.8223
Fenretinide	-1.82211
KC706	-1.81897
Ketobemidone	-1.81559
RU84687	-1.81343
2-[3-({Methyl[1-(2-Naphthoyl)Piperidin-4-Yl]Amino}Carbonyl)-2-Naphthyl]-1-(1-Naphthyl)-2-Oxoethylphosphonic Acid	-1.8054
Cupric oxide	-1.8037
Erythromycin	-1.8025
MIV-701	-1.80161
2,3,-Dihydroxybenzoylserine	-1.80152
Phosphonotyrosine	-1.79936
Brompheniramine	-1.79679
Sumanirole	-1.79065
XL228	-1.78532
Pentamidine	-1.78149
Alpha-1-proteinase inhibitor	-1.78091
N-Ethyl Retinamide	-1.77918
N-1H-indazol-5-yl-2-(6-methylpyridin-2-yl)quinazolin-4-amine	-1.77528
(2E)-N-{4-[(3-bromophenyl)amino]quinazolin-6-yl}-4-(dimethylamino)but-2-enamide	-1.77275
Bismuth subsalicylate	-1.7653
N-[(2',4'-DIFLUORO-4-HYDROXY-5-IODOBIPHENYL-3-YL)CARBONYL]-BETA-ALANINE	-1.76214
N-cyclooctylglycyl-N-(4-carbamimidoylbenzyl)-L-prolinamide	-1.75293
Adenosine-5'-Diphosphate-2',3'-Vanadate	-1.75071
Nilvadipine	-1.75065
Olaratumab	-1.74691
RU78191	-1.74618
Iron saccharate	-1.74493
Paroxetine	-1.74074
Reidispongiolide C	-1.73808
1,3,2-Dioxaborolan-2-Ol	-1.73709
RU79256	-1.73566
1-METHYL-3-TRIFLUOROMETHYL-1H-THIENO[2,3-C]PYRAZOLE-5-CARBOXYLIC ACID (2-MERCAPTO-ETHYL)-AMIDE	-1.73521
Aluminium phosphate	-1.73328
RU79072	-1.73127
N-[5-(ETHYLSULFONYL)-2-METHOXYPHENYL]-5-[3-(2-PYRIDINYL)PHENYL]-1,3-OXAZOL-2-AMINE	-1.72914
2-(4-CARCOXY-5-ISOPROPYLTHIAZOLYL)BENZOPIPERIDINE	-1.72825
Diethylstilbestrol	-1.72473
Mitotane	-1.72306
RU78299	-1.72191
Butenoic Acid	-1.72032
3-(2-aminoquinazolin-6-yl)-1-(3,3-dimethylindolin-6-yl)-4-methylpyridin-2(1H)-one	-1.7192
N'-(6-aminopyridin-3-yl)-N-(2-cyclopentylethyl)-4-methyl-benzene-1,3-dicarboxamide	-1.71842
Conestat alfa	-1.71355
N-ISOBUTYL-N-[4-METHOXYPHENYLSULFONYL]GLYCYL HYDROXAMIC ACID	-1.71308
RU78262	-1.71226
RU85493	-1.71174
Naphthyridine Inhibitor	-1.71055
Human C1-esterase inhibitor	-1.70833
Olmutinib	-1.70771
4-Methyl-Histidine	-1.70687
4-O-(4,6-Dideoxy-4-{[4,5,6-Trihydroxy-3-(Hydroxymethyl)Cyclohex-2-En-1-Yl]Amino}-Beta-D-Lyxo-Hexopyranosyl)-Alpha-D-Erythro-Hexopyranose	-1.70529
Jaspisamide A	-1.70322
Meperidine	-1.7013
Cinnarizine	-1.69232
Tegafur	-1.69025
ISO24	-1.68938
VX-765	-1.68634
Matuzumab	-1.68601
3-({4-[(5-chloro-1,3-benzodioxol-4-yl)amino]pyrimidin-2-yl}amino)benzenesulfonamide	-1.68601
Mibefradil	-1.6853
N'-(5-CHLORO-1,3-BENZODIOXOL-4-YL)-N-(3,4,5- TRIMETHOXYPHENYL)PYRIMIDINE-2,4-DIAMINE	-1.68449
N-(4-{4-AMINO-6-[4-(METHYLOXY)PHENYL]FURO[2,3-D]PYRIMIDIN-5-YL}PHENYL)-N'-[2-FLUORO-5-(TRIFLUOROMETHYL)PHENYL]UREA	-1.68387
N-Acetyl-Serine	-1.68196
Aflibercept	-1.68008
CEP-1347	-1.68002
Camostat	-1.67721
S-{3-[(4-ANILINOQUINAZOLIN-6-YL)AMINO]-3-OXOPROPYL}-L-CYSTEINE	-1.67646
4-O-(4,6-Dideoxy-4-{[4-[(4-O-Hexopyranosylhexopyranosyl)Oxy]-5,6-Dihydroxy-3-(Hydroxymethyl)Cyclohex-2-En-1-Yl]Amino}Hexopyranosyl)Hexopyranose	-1.67646
Turoctocog alfa pegol	-1.67576
4-(1,3-BENZOXAZOL-2-YL)-2,6-DIMETHYLPHENOL	-1.67265
N-(CYCLOPROPYLMETHYL)-4-(METHYLOXY)-3-({5-[3-(3-PYRIDINYL)PHENYL]-1,3-OXAZOL-2-YL}AMINO)BENZENESULFONAMIDE	-1.67255
Ramipril	-1.67063
2-{2-hydroxy-[1,1'-biphenyl]-3-yl}-1H-1,3-benzodiazole-5-carboximidamide	-1.66829
(2R,3R,4S,5R)-2-[6-amino-8-[(3,4-dichlorophenyl)methylamino]purin-9-yl]-5-(hydroxymethyl)oxolane-3,4-diol	-1.66739
Human Thrombin	-1.66717
Mangafodipir	-1.66601
3-({[(1Z)-(2-methoxyphenyl)methylidene]amino}oxy)propanoic acid	-1.66526
RU78300	-1.66485
(S)-N-(4-carbamimidoylbenzyl)-1-(2-(cyclohexyloxy)ethanoyl)pyrrolidine-2-carboxamide	-1.66276
4-Hydroxybutan-1-Aminium	-1.66011
N~3~-[3-(5-METHOXYPYRIDIN-3-YL)BENZYL]PYRIDINE-2,3-DIAMINE	-1.65938
Pralnacasan	-1.65753
2-[(3,5-Dichloro-4-trioxidanylphenyl)amino]benzoic acid	-1.65616
Adenosine 5'-phosphosulfate	-1.65547
Moroctocog alfa	-1.65328
N'-(3-CHLORO-4-METHOXY-PHENYL)-N-(3,4,5-TRIMETHOXYPHENYL)-1,3,5-TRIAZINE-2,4-DIAMINE	-1.65003
HYDROXYAMPHETAMINE HYDROBROMIDE	-1.64636
SNS-032	-1.64614
Etodolac	-1.64429
7-PYRIDIN-2-YL-N-(3,4,5-TRIMETHOXYPHENYL)-7H-PYRROLO[2,3-D]PYRIMIDIN-2-AMINE	-1.64301
(S)-N-(4-carbamimidoylbenzyl)-1-(3-cyclopentylpropanoyl)pyrrolidine-2-carboxamide	-1.6421
Pazopanib	-1.63986
Pegdinetanib	-1.63584
6-fluoro-2-(2-hydroxy-3-isobutoxy-phenyl)-1H-benzoimidazole-5-carboxamidine	-1.63544
Benzylamine	-1.63289
4-[(4-METHYL-1-PIPERAZINYL)METHYL]-N-[3-[[4-(3-PYRIDINYL)-2-PYRIMIDINYL]AMINO]PHENYL]-BENZAMIDE	-1.63254
VX-702	-1.63243
6,4'-Dihydroxy-3-Methyl-3',5'-Dibromoflavone	-1.62477
4-(1,3-BENZOXAZOL-2-YL)-2,6-DIBROMOPHENOL	-1.62428
RU90395	-1.6241
Batimastat	-1.62299
O-Trifluoromethylphenyl Anthranilic Acid	-1.62169
Heptaethylene glycol	-1.62149
Atosiban	-1.62106
Ardeparin	-1.62066
[4-(1,3,2-Dioxaborolan-2-Yloxy)Methyl]Benzamidine	-1.61826
Propofol	-1.61787
3,5-dibromobiphenyl-4-ol	-1.6176
N-[(5R,14R)-5-AMINO-5,14-DIMETHYL-4-OXO-3-OXA-18-AZATRICYCLO[15.3.1.1~7,11~]DOCOSA-1(21),7(22),8,10,17,19-HEXAEN-19-YL]-N-METHYLMETHANESULFONAMIDE	-1.6129
RU82197	-1.61081
3-(2-aminoquinazolin-6-yl)-4-methyl-1-[3-(trifluoromethyl)phenyl]pyridin-2(1H)-one	-1.60789
N6-Benzyl Adenosine-5'-Diphosphate	-1.6069
N-[3-[[4-[(5-CHLORO-1,3-BENZODIOXOL-4-YL)AMINO]PYRIMIDIN-2-YL]AMINO]PHENYL]METHANESULFONAMIDE	-1.60564
2-(3,5-DIMETHYLPHENYL)-1,3-BENZOXAZOLE	-1.60475
3',5'-DIFLUOROBIPHENYL-4-CARBOXYLIC ACID	-1.60298
N-[4-hydroxymethyl-cyclohexan-6-yl-1,2,3-triol]-4,6-dideoxy-4-aminoglucopyranoside	-1.60262
Methyl Methylsulfinylmethyl Sulfide	-1.59995
(6R)-2-amino-6-[2-(3'-methoxybiphenyl-3-yl)ethyl]-3,6-dimethyl-5,6-dihydropyrimidin-4(3H)-one	-1.59789
(S)-wiskostatin	-1.59736
4-Iodobenzo[B]Thiophene-2-Carboxamidine	-1.59641
ETIDRONATE DISODIUM	-1.58942
Omalizumab	-1.58908
Dibenzofuran-4,6-Dicarboxylic Acid	-1.58798
VITAMIN C	-1.58567
3-(4-Amino-1-Tert-Butyl-1h-Pyrazolo[3,4-D]Pyrimidin-3-Yl)Phenol	-1.5854
4-{[1-METHYL-2,4-DIOXO-6-(3-PHENYLPROP-1-YN-1-YL)-1,4-DIHYDROQUINAZOLIN-3(2H)-YL]METHYL}BENZOIC ACID	-1.58513
Trimipramine	-1.58341
1,6-DI-O-PHOSPHONO-D-MANNITOL	-1.58321
PASBN	-1.58312
Lonoctocog alfa	-1.58203
Aripiprazole lauroxil	-1.58173
2,6-dibromo-4-[(E)-2-phenylethenyl]phenol	-1.57974
Technetium Tc-99m arcitumomab	-1.57765
CYT997	-1.57635
2-(2-{2-[2-(2-{2-[2-(2-Ethoxy-Ethoxy)-Ethoxy]-Ethoxy}-Ethoxy)-Ethoxy]-Ethoxy}-Ethoxy)-Ethanol, Polyethyleneglycol Peg400	-1.57605
METHYL N-[(2',4'-DIFLUORO-4-HYDROXY-5-IODOBIPHENYL-3-YL)CARBONYL]-BETA-ALANINATE	-1.57363
RU85053	-1.57184
2-{4-[4-(4-Chloro-Phenoxy)-Benzenesulfonyl]-Tetrahydro-Pyran-4-Yl}-N-Hydroxy-Acetamide	-1.57134
Catumaxomab	-1.5709
YSIL6	-1.57057
3-(4-Fluorophenyl)-2-(6-Methylpyridin-2-Yl)-5,6-Dihydro-4h-Pyrrolo[1,2-B]Pyrazole	-1.5701
Andrographolide	-1.56921
Clioquinol	-1.56891
CRA_8696	-1.56705
Ulapualide A	-1.56466
1-cyclopentyl-3-(1H-pyrrolo[2,3-b]pyridin-5-yl)-1H-pyrazolo[3,4-d]pyrimidin-4-amine	-1.564
Tezampanel	-1.56306
Antithymocyte immunoglobulin (rabbit)	-1.55856
Fx-1006A	-1.55831
Glatiramer	-1.55621
FKB-001	-1.55608
Zeranol	-1.55564
Oleic Acid	-1.55093
6-chloro-N-pyrimidin-5-yl-3-{[3-(trifluoromethyl)phenyl]amino}-1,2-benzisoxazole-7-carboxamide	-1.54989
O2-Sulfo-Glucuronic Acid	-1.54921
3,3',5,5'-Tetraiodothyroacetic Acid	-1.54772
RU79073	-1.54683
Tafamidis	-1.54672
Tertomotide	-1.54662
(9R,10R)-9-(S-glutathionyl)-10-hydroxy-9,10-dihydrophenanthrene	-1.54618
[(3R)-3-(Methylcarbamoyl)-2-{[(2-methyl-2-propanyl)oxy]carbonyl}-1,2,3,4-tetrahydro-7-isoquinolinyl]sulfamic acid	-1.54563
Aminophylline	-1.54442
DL-Methylephedrine	-1.54361
Aplyronine A	-1.54335
2',6'-DIFLUOROBIPHENYL-4-CARBOXYLIC ACID	-1.54163
4-(3-Pyridin-2-Yl-1h-Pyrazol-4-Yl)Quinoline	-1.54157
3-[(9H-fluoren-9-ylideneamino)oxy]propanoic acid	-1.53819
2,5-dichloro-N-(3,5-dibromo-4-hydroxyphenyl)benzamide	-1.53775
N~3~-[3-(1H-INDOL-6-YL)BENZYL]PYRIDINE-2,3-DIAMINE	-1.53553
N-(3,5-dibromo-4-hydroxyphenyl)-4-hydroxy-3,5-dimethylbenzamide	-1.53432
4-(1,3,2-Dioxaborolan-2-Yloxy)Butan-1-Aminium	-1.53382
BENZYL 6-BENZYL-5,7-DIOXO-6,7-DIHYDRO-5H-[1,3]THIAZOLO[3,2-C]PYRIMIDINE-2-CARBOXYLATE	-1.52969
Kabiramide C	-1.52741
3',5'-DIBROMO-2',4,4',6'-TETRAHYDROXY AURONE	-1.52648
Varlitinib	-1.52625
Z-Val-Ala-Asp fluoromethyl ketone	-1.52613
Mdl 101,146	-1.52427
PAS219	-1.52251
(2S)-3-[(9H-fluoren-9-ylideneamino)oxy]-2-methylpropanoic acid	-1.52057
Sulindac	-1.51716
Glembatumumab vedotin	-1.51689
7-(1,1-Dioxo-1h-Benzo[D]Isothiazol-3-Yloxymethyl)-2-(Oxalyl-Amino)-4,7-Dihydro-5h-Thieno[2,3-C]Pyran-3-Carboxylic Acid	-1.51383
5-aminonaphthalene-1-sulfonic acid	-1.51304
N-[amino(imino)methyl]-2-[2-(2-chlorophenyl)-4-(4-propoxyphenyl)-3-thienyl]acetamide	-1.51246
2-(2-Hydroxy-Phenyl)-3h-Benzoimidazole-5-Carboxamidine	-1.51202
Clove oil	-1.50817
(4-{(2S)-2-[(tert-butoxycarbonyl)amino]-3-methoxy-3-oxopropyl}phenyl)methaneseleninic acid	-1.50671
TB-402	-1.50611
Reidispongiolide A	-1.50556
Aripiprazole	-1.50411
2,6-dibromo-4-phenoxyphenol	-1.5023
PYRIMIDINE-4,6-DICARBOXYLIC ACID BIS-[(PYRIDIN-3-YLMETHYL)-AMIDE]	-1.50032
Panitumumab	-1.50008
CTS-21166	-1.49986
3-(2-AMINO-6-BENZOYLQUINAZOLIN-3(4H)-YL)-N-CYCLOHEXYL-N-METHYLPROPANAMIDE	-1.49976
4-[3-(dibenzylamino)phenyl]-2,4-dioxobutanoic acid	-1.49869
N-(3,5-dibromo-4-hydroxyphenyl)-2,6-dimethylbenzamide	-1.49756
AZD 3355	-1.49695
Loxapine	-1.49694
Fasudil	-1.49569
Fexaramine	-1.49366
N-[4-(5-fluoro-6-methylpyridin-2-yl)-5-quinoxalin-6-yl-1H-imidazol-2-yl]acetamide	-1.49352
3,5,3',5'-Tetrachloro-Biphenyl-4,4'-Diol	-1.49269
2-(2,6-DICHLOROPHENYL)-1,3-BENZOXAZOLE-6-CARBOXYLIC ACID	-1.49227
4-(2-aminoethyl)-2-cyclohexylphenol	-1.4902
Clonidine	-1.4895
CRx-139	-1.48562
MMI-175	-1.48477
N-{1-[5-(1-Carbamoyl-2-Mercapto-Ethylcarbamoyl)-Pentylcarbamoyl]-2-[4-(Difluoro-Phosphono-Methyl)-Phenyl]-Ethyl}-3-{2-[4-(Difluoro-Phosphono-Methyl)-Phenyl]-Acetylamino}-Succinamic Acid	-1.48402
INS 316	-1.48118
N-(3,5-dibromo-4-hydroxyphenyl)benzamide	-1.48105
(3r)-4-(P-Toluenesulfonyl)-1,4-Thiazane-3-Carboxylicacid-L-Phenylalanine Ethyl Ester	-1.48034
[(4-{4-[4-(Difluoro-Phosphono-Methyl)-Phenyl]-Butyl}-Phenyl)-Difluoro-Methyl]-Phosphonic Acid	-1.47889
N-{2-methyl-5-[(6-phenylpyrimidin-4-yl)amino]phenyl}methanesulfonamide	-1.47873
Coagulation Factor IX (Recombinant)	-1.4784
4-(4-chlorobenzyl)-1-(7H-pyrrolo[2,3-d]pyrimidin-4-yl)piperidin-4-aminium	-1.47739
N-cycloheptylglycyl-N-(4-carbamimidoylbenzyl)-L-prolinamide	-1.47737
XL784	-1.47624
4-[(1S)-1-(3-fluoro-4-methoxyphenyl)-2-(2-methoxy-5-nitrophenyl)ethyl]-1H-imidazol-2-amine	-1.47486
3',5'-Dinitro-N-Acetyl-L-Thyronine	-1.47472
2',4'-DICHLORO-4-HYDROXY-1,1'-BIPHENYL-3-CARBOXYLIC ACID	-1.47469
1-(1-methylethyl)-3-quinolin-6-yl-1H-pyrazolo[3,4-d]pyrimidin-4-amine	-1.47276
Fenoterol	-1.47268
4-Hydroxy-2-Butanone	-1.47065
2-({5-CHLORO-2-[(2-METHOXY-4-MORPHOLIN-4-YLPHENYL)AMINO]PYRIMIDIN-4-YL}AMINO)-N-METHYLBENZAMIDE	-1.46875
TNX-901	-1.46628
Cetilistat	-1.46623
{3-[3-(3,4-Dimethoxy-Phenyl)-1-(1-{1-[2-(3,4,5-Trimethoxy-Phenyl)-Butyryl]-Piperidin-2yl}-Vinyloxy)-Propyl]-Phenoxy}-Acetic Acid	-1.46572
Epratuzumab	-1.46546
2,6-dimethyl-4-[(E)-2-phenylethenyl]phenol	-1.46191
N~2~-1H-benzimidazol-5-yl-N~4~-(3-cyclopropyl-1H-pyrazol-5-yl)pyrimidine-2,4-diamine	-1.4619
Antipyrine	-1.45974
EVT-101	-1.45576
MLN-977	-1.45481
N-[1-(2,6-dimethoxybenzyl)piperidin-4-yl]-4-sulfanylbutanamide	-1.45367
3-{6-[(8-HYDROXY-QUINOLINE-2-CARBONYL)-AMINO]-2-THIOPHEN-2-YL-HEXANOYLAMINO}-4-OXO-BUTYRI ACID	-1.45345
(S)-N-(4-carbamimidoylbenzyl)-1-(3-cyclohexylpropanoyl)pyrrolidine-2-carboxamide	-1.45324
1-[1-(3-aminophenyl)-3-tert-butyl-1H-pyrazol-5-yl]-3-phenylurea	-1.45238
3-(CARBOXYMETHOXY)THIENO[2,3-B]PYRIDINE-2-CARBOXYLIC ACID	-1.45217
Zinc Trihydroxide	-1.45124
[4-({4-[(5-cyclopropyl-1H-pyrazol-3-yl)amino]quinazolin-2-yl}amino)phenyl]acetonitrile	-1.45047
Carboxyatractyloside	-1.44842
N-(M-Trifluoromethylphenyl) Phenoxazine-4,6-Dicarboxylic Acid	-1.44825
Freselestat	-1.44822
WAY-151693	-1.44803
Tetrastearoyl cardiolipin	-1.44682
(2S)-1-(3H-Indol-3-yl)-3-{[5-(6-isoquinolinyl)-3-pyridinyl]oxy}-2-propanamine	-1.44559
2-NAPHTHALENESULFONIC ACID	-1.44425
Ondansetron	-1.4428
PYRIMIDINE-4,6-DICARBOXYLIC ACID BIS-(4-FLUORO-3-METHYL-BENZYLAMIDE)	-1.43981
(2S)-1-(2,5-dimethylphenoxy)-3-morpholin-4-ylpropan-2-ol	-1.43898
1-Tert-Butyl-3-(4-Chloro-Phenyl)-1h-Pyrazolo[3,4-D]Pyrimidin-4-Ylamine	-1.43858
Drotrecogin alfa	-1.4384
(R)-TRANS-4-(1-AMINOETHYL)-N-(4-PYRIDYL) CYCLOHEXANECARBOXAMIDE	-1.43518
N~3~-BENZYLPYRIDINE-2,3-DIAMINE	-1.43207
Heptyl-Beta-D-Glucopyranoside	-1.43194
Cytidine	-1.43041
CTS-1027	-1.42832
OMS-103HP	-1.4278
Dinitrochlorobenzene	-1.42652
Alendronic acid	-1.4247
(6S)-2-amino-6-(3'-methoxybiphenyl-3-yl)-3,6-dimethyl-5,6-dihydropyrimidin-4(3H)-one	-1.42425
Gpi-1046	-1.42367
OSI-930	-1.42334
INCB7839	-1.42172
6-[2-(1H-INDOL-6-YL)ETHYL]PYRIDIN-2-AMINE	-1.42042
3-[({(1E)-[2-(trifluoromethyl)phenyl]methylidene}amino)oxy]propanoic acid	-1.42015
Tandutinib	-1.41905
baricitinib	-1.41886
N-[2-(METHYLAMINO)ETHYL]-5-ISOQUINOLINESULFONAMIDE	-1.41878
Aminocaproic Acid	-1.41877
4-(2-aminoethyl)-2-ethylphenol	-1.41875
(21S)-1AZA-4,4-DIMETHYL-6,19-DIOXA-2,3,7,20-TETRAOXOBICYCLO[19.4.0] PENTACOSANE	-1.41868
Amiodarone	-1.41788
N~3~-[5-(1H-INDOL-6-YL)-2-(PYRIDIN-2-YLMETHOXY)BENZYL]PYRIDINE-2,3-DIAMINE	-1.41752
[3-(Dodecanoylamino)Propyl](Hydroxy)Dimethylammonium	-1.41566
Racepinephrine	-1.41337
Pentabromophenol	-1.40992
[{2-bromo-4-[(2R)-3-oxo-2,3-diphenylpropyl]phenyl}(difluoro)methyl]phosphonic acid	-1.40794
(S)-N-(4-carbamimidoylbenzyl)-1-(2-(cyclohexylamino)ethanoyl)pyrrolidine-2-carboxamide	-1.40782
ISIS 113715	-1.40658
1-METHYL-3-PHENYL-1H-PYRAZOL-5-YLSULFAMIC ACID	-1.40641
4-BROMO-3-(CARBOXYMETHOXY)-5-(4-HYDROXYPHENYL)THIOPHENE-2-CARBOXYLIC ACID	-1.4063
Arbutamine	-1.40621
Zalutumumab	-1.40612
2,4,6-Tribromophenol	-1.40587
L-709,587	-1.4055
{4-[(2s,4e)-2-(1,3-Benzothiazol-2-Yl)-2-(1h-1,2,3-Benzotriazol-1-Yl)-5-Phenylpent-4-Enyl]Phenyl}(Difluoro)Methylphosphonic Acid	-1.40445
1-(4-Tert-Butylcarbamoyl-Piperazine-1-Carbonyl)-3-(3-Guanidino-Propyl)-4-Oxo-Azetidine-2-Carboxylic Acid	-1.40427
Heparin	-1.40252
(3r)-4-(P-Toluenesulfonyl)-1,4-Thiazane-3-Carboxylicacid-L-Leucine	-1.39955
1-(4-Amidinophenyl)-3-(4-Chlorophenyl)Urea	-1.39941
Lenograstim	-1.39779
4,6-DIDEOXY-4-{[4-[(4-O-HEXOPYRANOSYLHEXOPYRANOSYL)OXY]-5,6-DIHYDROXY-3-(HYDROXYMETHYL)CYCLOHEX-2-EN-1-YL]AMINO}HEXOPYRANOSYL-(1->4)HEXOPYRANOSYL-(1->4)HEXOPYRANOSE	-1.3971
Foretinib	-1.39652
AZD-8330	-1.39642
(2R)-2-(4-CHLOROPHENYL)-2-PHENYLETHANAMINE	-1.39576
PH-284	-1.38994
Ramucirumab	-1.38942
Dodecane-Trimethylamine	-1.38758
Uridine 5'-triphosphate	-1.38748
4-(4-FLUOROBENZYL)PIPERIDINE	-1.38696
CA4P	-1.38618
4-(Hydroxymethyl)Benzamidine	-1.3842
Hexanoyl-CoA	-1.38355
5-(3-HYDROXYPHENYL)ISOTHIAZOL-3(2H)-ONE 1,1-DIOXIDE	-1.38339
[[4-(Aminomethyl)Phenyl]Amino]Oxo-Acetic Acid,	-1.38263
(2S)-4-(4-fluorobenzyl)-N-(3-sulfanylpropyl)piperazine-2-carboxamide	-1.3816
5-(2-ETHOXYETHYL)-5-[4-(4-FLUOROPHENOXY)PHENOXY]PYRIMIDINE-2,4,6(1H,3H,5H)-TRIONE	-1.38137
4-{[4-{[(1R,2R)-2-(dimethylamino)cyclopentyl]amino}-5-(trifluoromethyl)pyrimidin-2-yl]amino}-N-methylbenzenesulfonamide	-1.38118
Hemi-Babim	-1.38116
(S)-N-(4-carbamimidoylbenzyl)-1-(2-(cyclopentyloxy)ethanoyl)pyrrolidine-2-carboxamide	-1.38059
Inotuzumab ozogamicin	-1.38021
{[7-(Difluoro-Phosphono-Methyl)-Naphthalen-2-Yl]-Difluoro-Methyl}-Phosphonic Acid	-1.37785
(Z,Z)-4-Hydroxy-N,N,N-Trimethyl-10-Oxo-7-[(1-Oxo-9-Octadecenyl)Oxy]-3,5,9-Trioxa-4-Phosphaheptacos-18-En-1-Aminium-4-Oxide	-1.37763
Thrombomodulin Alfa	-1.37755
Novo Nordisk a/S Compound	-1.37735
Guanidine-3-Propanol	-1.37653
2-amino-6-[2-(1H-indol-6-yl)ethyl]pyrimidin-4(3H)-one	-1.37522
[4-({[5-Benzyloxy-1-(3-Carbamimidoyl-Benzyl)-1h-Indole-2-Carbonyl]-Amino}-Methyl)-Phenyl]-Trimethyl-Ammonium	-1.37298
3-({4-[(5-CHLORO-1,3-BENZODIOXOL-4-YL)AMINO]PYRIMIDIN-2-YL}AMINO)BENZAMIDE	-1.36803
Omega-3-acid ethyl esters	-1.36765
N-[amino(imino)methyl]-2-(2,5-diphenyl-1H-pyrrol-1-yl)acetamide	-1.36711
Antithrombin Alfa	-1.3671
Anisomycin	-1.36615
N-METHYL-1-[4-(9H-PURIN-6-YL)PHENYL]METHANAMINE	-1.36545
3-(BUTYLSULPHONYL)-PROPANOIC ACID	-1.36544
5-(2-methylpiperazine-1-sulfonyl)isoquinoline	-1.36468
N-(1-benzylpiperidin-4-yl)-4-sulfanylbutanamide	-1.35887
3-(3,5-Dibromo-4-Hydroxy-Benzoyl)-2-Ethyl-Benzofuran-6-Sulfonic Acid (4-Sulfamoyl-Phenyl)-Amide	-1.35854
1-[4-(4-chlorophenyl)-1-(7H-pyrrolo[2,3-d]pyrimidin-4-yl)piperidin-4-yl]methanamine	-1.35667
S-(4-BROMOBENZYL)CYSTEINE	-1.35608
(3ASR,4RS,8ASR,8BRS)-4-(2-(4-FLUOROBENZYL)-1,3-DIOXODEACAHYDROPYRROLO[3,4-A] PYRROLIZIN-4-YL)BENZAMIDINE	-1.35518
1-[4-(4-chlorobenzyl)-1-(7H-pyrrolo[2,3-d]pyrimidin-4-yl)piperidin-4-yl]methanamine	-1.35518
2-{2-[(3,5-dimethylphenyl)amino]pyrimidin-4-yl}-N-[(1S)-2-hydroxy-1-methylethyl]-4-methyl-1,3-thiazole-5-carboxamide	-1.35502
6-(DIFLUORO-PHOSPHONO-METHYL)-NAPHTHALENE-2-CARBOXYLIC ACID	-1.35495
Cyclic GMP	-1.35485
1,2-diacyl-sn-glycero-3-phosphoinositol	-1.35445
2-(6-methylpyridin-2-yl)-N-pyridin-4-ylquinazolin-4-amine	-1.3544
4-BROMO-3-(CARBOXYMETHOXY)-5-[3-(CYCLOHEXYLAMINO)PHENYL]THIOPHENE-2-CARBOXYLIC ACID	-1.35327
SD118	-1.35319
Verpasep caltespen	-1.35237
Atropine	-1.3516
6-(Oxalyl-Amino)-1h-Indole-5-Carboxylic Acid	-1.3497
{[2-(1h-1,2,3-Benzotriazol-1-Yl)-2-(3,4-Difluorophenyl)Propane-1,3-Diyl]Bis[4,1-Phenylene(Difluoromethylene)]}Bis(Phosphonic Acid)	-1.34893
Phendimetrazine	-1.34836
Coproporphyrinogen III	-1.34732
N-(4-chlorophenyl)-2-[(pyridin-4-ylmethyl)amino]benzamide	-1.34586
Compound 12, N-Acetyl-4-[(Carboxycarbonyl)(2-Carboxyphenyl)Amino]-N-Pentyl-1-Napthylalaniamide	-1.34418
2'-O-Acetyl Adenosine-5-Diphosphoribose	-1.34238
Damoctocog alfa pegol	-1.34133
2-{4-[(2s)-2-[({[(1s)-1-Carboxy-2-Phenylethyl]Amino}Carbonyl)Amino]-3-Oxo-3-(Pentylamino)Propyl]Phenoxy}Malonic Acid	-1.34088
Isoetarine	-1.33874
Tyloxapol	-1.33858
3-(3,5-Dibromo-4-Hydroxy-Benzoyl)-2-Ethyl-Benzofuran-6-Sulfonic Acid [4-(Thiazol-2-Ylsulfamoyl)-Phenyl]-Amide	-1.3372
2-[4-(3-METHYL-1H-PYRAZOL-4-YL)PHENYL]ETHANAMINE	-1.33675
3-(Oxalyl-Amino)-Naphthalene-2-Carboxylic Acid	-1.33615
Ethyl Dihydrogen Phosphate	-1.33608
(2S)-4-(4-fluorobenzyl)-N-(2-sulfanylethyl)piperazine-2-carboxamide	-1.3348
6-[2-(3'-METHOXYBIPHENYL-3-YL)ETHYL]PYRIDIN-2-AMINE	-1.33327
Verubecestat	-1.33188
PYRIMIDINE-4,6-DICARBOXYLIC ACID BIS-(3-METHYL-BENZYLAMIDE)	-1.33187
5-[3-(BENZYLAMINO)PHENYL]-4-BROMO-3-(CARBOXYMETHOXY)THIOPHENE-2-CARBOXYLIC ACID	-1.33069
Cyanamide	-1.32896
Furosemide	-1.32656
Ruplizumab	-1.32642
4-(6-{[(1R)-1-(hydroxymethyl)propyl]amino}imidazo[1,2-b]pyridazin-3-yl)benzoic acid	-1.32587
SGS518	-1.32241
FavId	-1.32131
(S)-2-METHYL-1-[(4-METHYL-5-ISOQUINOLINE)SULFONYL]-HOMOPIPERAZINE	-1.32057
Albutrepenonacog alfa	-1.31977
(3R)-METHYLCARBAMOYL-7-SULFOAMINO-3,4-DIHYDRO-1H-ISOQUINOLINE-2-CARBOXYLIC ACID BENZYL ESTER	-1.31945
4-PHOSPHONOOXY-PHENYL-METHYL-[4-PHOSPHONOOXY]BENZEN	-1.3193
PNU177836	-1.31813
5-(4-METHOXYBIPHENYL-3-YL)-1,2,5-THIADIAZOLIDIN-3-ONE 1,1-DIOXIDE	-1.31782
TERT-BUTYL 4-({[4-(BUT-2-YN-1-YLAMINO)PHENYL]SULFONYL}METHYL)-4-[(HYDROXYAMINO)CARBONYL]PIPERIDINE-1-CARBOXYLATE	-1.31761
(1S)-1-(1H-INDOL-3-YLMETHYL)-2-(2-PYRIDIN-4-YL-[1,7]NAPHTYRIDIN-5-YLOXY)-EHYLAMINE	-1.31632
4-(1h-Imidazol-4-Yl)-3-(5-Ethyl-2,4-Dihydroxy-Phenyl)-1h-Pyrazole	-1.31602
2-(3-METHYLPHENYL)-1H-INDOLE-5-CARBOXIMIDAMIDE	-1.31465
5-(3-{3-[3-HYDROXY-2-(METHOXYCARBONYL)PHENOXY]PROPENYL}PHENYL)-4-(HYDROXYMETHYL)ISOXAZOLE-3-CARBOXYLIC ACID	-1.31169
Oxibendazole	-1.31159
4,6-dideoxy-4-amino-alpha-D-glucose	-1.31096
3-(4-CHLOROPHENYL)-5-(METHYLTHIO)-4H-1,2,4-TRIAZOLE	-1.31023
S-(P-Nitrobenzyl)Glutathione	-1.30922
N-[4-(2-{2-[3-(2-Bromo-Acetylamino)-Propionylamino]-3-Hydroxy-Propionylamino}-Ethyl)-Phenyl]-Oxalamic Acid	-1.30909
KAI-1455	-1.30793
4-Carbamoyl-4-{[6-(Difluoro-Phosphono-Methyl)-Naphthalene-2-Carbonyl]-Amino}-Butyric Acid	-1.30716
Rabeprazole	-1.30587
(4R)-7,8-dichloro-1',9-dimethyl-1-oxo-1,2,4,9-tetrahydrospiro[beta-carboline-3,4'-piperidine]-4-carbonitrile	-1.30558
Lipegfilgrastim	-1.30515
2-(Oxalyl-Amino)-4,7-Dihydro-5h-Thieno[2,3-C]Thiopyran-3-Carboxylic Acid	-1.30477
3-pyridin-4-yl-1H-indazole	-1.30299
Dienestrol	-1.29993
(2S)-1-{[5-(3-METHYL-1H-INDAZOL-5-YL)PYRIDIN-3-YL]OXY}-3-PHENYLPROPAN-2-AMINE	-1.29972
Lumiliximab	-1.29967
Etonogestrel	-1.29705
Bis-Benzamidine	-1.29616
L-Alpha-Glycerophosphorylserine	-1.29475
Rilapladib	-1.29434
2-(Oxalyl-Amino)-Benzoic Acid	-1.29271
(3r)-1-Acetyl-3-Methylpiperidine	-1.29236
2-[{4-[(2S)-2-{[(Allyloxy)carbonyl]amino}-3-({4-[3-hydroxy-2-(methoxycarbonyl)phenoxy]butyl}amino)-3-oxopropyl]phenyl}(carboxycarbonyl)amino]benzoic acid	-1.29183
FONDAPARINUX SODIUM	-1.29169
3,6-DIAMINO-5-CYANO-4-(4-ETHOXYPHENYL)THIENO[2,3-B]PYRIDINE-2-CARBOXAMIDE	-1.29145
Butyric Acid	-1.29089
Quizartinib	-1.29047
[(3S)-3-(Methylcarbamoyl)-2-{[(2-methyl-2-propanyl)oxy]carbonyl}-1,2,3,4-tetrahydro-7-isoquinolinyl]sulfamic acid	-1.28928
N-[1-(5-bromo-2,3-dimethoxybenzyl)piperidin-4-yl]-4-sulfanylbutanamide	-1.28871
Myristoyl-Coa	-1.28553
Bemiparin	-1.28489
Huperzine B	-1.28369
M-(N,N,N-Trimethylammonio)-2,2,2-Trifluoro-1,1-Dihydroxyethylbenzene	-1.2823
5-Amidino-Benzimidazole	-1.2812
CRA_16847	-1.28029
Coagulation Factor IX Human	-1.28025
Piribedil	-1.28022
Apremilast	-1.27991
4-Benzoylamino-4-{1-{1-Carbamoyl-2-[4-(Difluoro-Phosphono-Methyl)-Phenyl]-Ethylcarbamoyl}-2-[4-(Difluoro-Phosphono-Methyl)-Phenyl]-Ethylcarbamoyl}-Butyric Acid	-1.27883
Olanzapine	-1.27643
N-{2,2-DIFLUORO-2-[(2R)-PIPERIDIN-2-YL]ETHYL}-2-[2-(1H-1,2,4-TRIAZOL-1-YL)BENZYL][1,3]OXAZOLO[4,5-C]PYRIDIN-4-AMINE	-1.27622
Nonivamide	-1.27533
METHYL-PHE-PRO-AMINO-CYCLOHEXYLGLYCINE	-1.27412
Denufosol	-1.27233
URSODIOL	-1.27208
2-(Carboxymethoxy)-5-[(2s)-2-({(2s)-2-[(3-Carboxypropanoyl)Amino] -3-Phenylpropanoyl}Amino)-3-Oxo-3-(Pentylamino)Propyl]Benzoic Acid	-1.26963
Xamoterol	-1.26901
2-O-(4'-AMIDINOPHENYL)-5-O-(3''-AMIDINOPHENYL)-1,4:3,6-DIANHYDRO-D-SORBITOL	-1.267
1-butanoyl-N-(4-carbamimidoylbenzyl)-L-prolinamide	-1.26585
9-Butyl-8-(2,5-Dimethoxy-Benzyl)-2-Fluoro-9h-Purin-6-Ylamine	-1.26558
BENZOTHIAZOLE	-1.26381
LJP 1082	-1.26359
(4R,2S)-5'-(4-(4-CHLOROBENZYLOXY)PYRROLIDIN-2-YLMETHANESULFONYL)ISOQUINOLINE	-1.26276
AC-(D)PHE-PRO-BOROHOMOORNITHINE-OH	-1.26237
4-BROMO-3-(CARBOXYMETHOXY)-5-PHENYLTHIOPHENE-2-CARBOXYLIC ACID	-1.26129
(S)-N-(4-carbamimidoylbenzyl)-1-(2-(cyclopentylamino)ethanoyl)pyrrolidine-2-carboxamide	-1.26016
4-{[1-Methyl-5-(2-Methyl-Benzoimidazol-1-Ylmethyl)-1h-Benzoimidazol-2-Ylmethyl]-Amino}-Benzamidine	-1.25959
CRA_10655	-1.25867
Geldanamycin	-1.25742
Compound 5, 2-(Naphthalen-1-Yl-Oxalyl-Amino)-Benzoicacid	-1.25658
Thieno[2,3-B]Pyridine-2-Carboxamidine	-1.25528
Raltitrexed	-1.25486
Vasopressin	-1.25307
Thyrotropin alfa	-1.25199
Turoctocog alfa	-1.25091
Pirbuterol	-1.25065
1S,3AS,8AS-TRIMETHYL-1-OXIDO-1,2,3,3A,8,8A-HEXAHYDROPYRROLO[2,3-B]INDOL-5-YL 2-ETHYLPHENYLCARBAMATE	-1.25035
N-ACETYL-L-PHENYLALANYL-4-[DIFLUORO(PHOSPHONO)METHYL]-L-PHENYLALANINAMIDE	-1.24843
tertomotide	-1.24806
5-(5-chloro-2,4-dihydroxyphenyl)-N-ethyl-4-[4-(morpholin-4-ylmethyl)phenyl]isoxazole-3-carboxamide	-1.24772
N4-(N,N-DIPHENYLCARBAMOYL)-AMINOGUANIDINE	-1.24747
Sulfadoxine	-1.24685
Icatibant	-1.24665
2-(Oxalyl-Amino)-4,5,6,7-Tetrahydro-Thieno[2,3-C]Pyridine-3-Carboxylic Acid	-1.24653
SPP 301	-1.24651
12-Bromododecanoic Acid	-1.24482
Danaparoid	-1.24239
(1S)-2-(1H-INDOL-3-YL)-1-[({5-[(E)-2-PYRIDIN-4-YLVINYL]PYRIDIN-3-YL}OXY)METHYL]ETHYLAMINE	-1.24131
4-(N,N-Dimethylamino)Cinnamoyl-Coa	-1.2397
6-CARBAMIMIDOYL-2-[2-HYDROXY-5-(3-METHOXY-PHENYL)-INDAN-1-YL]-HEXANOIC ACID	-1.23902
Chymopapain	-1.23757
4-{[(2S)-3-(tert-butylamino)-2-hydroxypropyl]oxy}-3H-indole-2-carbonitrile	-1.23746
5-(5-CHLORO-2,4-DIHYDROXYPHENYL)-N-ETHYL-4-(4-METHOXYPHENYL)ISOXAZOLE-3-CARBOXAMIDE	-1.23626
Ingenol mebutate	-1.23494
N~3~-(3-PYRIDIN-3-YLBENZYL)PYRIDINE-2,3-DIAMINE	-1.23372
2-(2-Hydroxy-Phenyl)-1h-Indole-5-Carboxamidine	-1.23335
2-[(7-HYDROXY-NAPHTHALEN-1-YL)-OXALYL-AMINO]-BENZOIC ACID	-1.23294
AS-8112	-1.23286
ruxolitinib	-1.23286
Sulodexide	-1.23116
1,2,5-THIADIAZOLIDIN-3-ONE-1,1-DIOXIDE	-1.23113
Ethyl Oxo(Piperidin-1-Yl)Acetate	-1.22999
4-bromo-6-(6-hydroxy-1,2-benzisoxazol-3-yl)benzene-1,3-diol	-1.22939
Sp7343-Sp7964	-1.2252
Odanacatib	-1.2243
Hydroxyfasudil	-1.22374
Bethanidine	-1.22291
Spermine	-1.2227
Carbocisteine	-1.2225
Icodextrin	-1.22137
Afatinib	-1.22113
ISOTHIAZOLIDINONE ANALOG	-1.22017
4-CHLORO-6-(4-PIPERAZIN-1-YL-1H-PYRAZOL-5-YL)BENZENE-1,3-DIOL	-1.21941
(R)-tacrine(10)-hupyridone	-1.21933
Indigotindisulfonic Acid	-1.21813
Protamine sulfate	-1.21784
2-(2-Hydroxy-5-Methoxy-Phenyl)-1h-Benzoimidazole-5-Carboxamidine	-1.21766
(1-Methyl-1h-Imidazol-2-Yl)-(3-Methyl-4-{3-[(Pyridin-3-Ylmethyl)-Amino]-Propoxy}-Benzofuran-2-Yl)-Methanone	-1.21753
Diethylphosphono Group	-1.21612
5-(2-Fluoro-5-{(1E)-3-[3-hydroxy-2-(methoxycarbonyl)phenoxy]-1-propen-1-yl}phenyl)-1,2-oxazole-3-carboxylic acid	-1.21591
5-(4-CHLORO-5-PHENYL-3-THIENYL)-1,2,5-THIADIAZOLIDIN-3-ONE 1,1-DIOXIDE	-1.21587
Dimetacrine	-1.21498
(3S)-4-{[4-(BUT-2-YNYLOXY)PHENYL]SULFONYL}-N-HYDROXY-2,2-DIMETHYLTHIOMORPHOLINE-3-CARBOXAMIDE	-1.21241
+/-METHYL 4-(AMINOIMINOMETHYL)-BETA-[3- INH (AMINOIMINO)PHENYL]BENZENE PENTANOATE	-1.21221
3-PYRIDIN-4-YL-2,4-DIHYDRO-INDENO[1,2-.C.] PYRAZOLE	-1.20961
(4ar,6s,8ar)-11-[8-(1,3-Dioxo-1,3-Dihydro-2h-Isoindol-2-Yl)Octyl]-6-Hydroxy-3-Methoxy-5,6,9,10-Tetrahydro-4ah-[1]Benzofuro[3a,3,2-Ef][2]Benzazepin-11-Ium	-1.20734
N-[2-({[amino(imino)methyl]amino}oxy)ethyl]-2-{6-chloro-3-[(2,2-difluoro-2-phenylethyl)amino]-2-fluorophenyl}acetamide	-1.2071
2-[(2-methoxyethyl)amino]-4-(4-oxo-1,2,3,4-tetrahydro-9H-carbazol-9-yl)benzamide	-1.20663
Pancrelipase	-1.20643
Perifosine	-1.20591
Nalpha-(2-Naphthylsulfonylglycyl)-3-Amidino-D,L-Phenylalanine-Isopropylester	-1.20561
Acetohexamide	-1.20406
8-(2,5-Dimethoxy-Benzyl)-2-Fluoro-9-Pent-9h-Purin-6-Ylamine	-1.20334
(S)-1-PHENYL-1-[4-(9H-PURIN-6-YL)PHENYL]METHANAMINE	-1.20196
Pyruvaldehyde	-1.20187
Staurosporine	-1.20111
6-{4-[4-(4-CHLOROPHENYL)PIPERIDIN-4-YL]PHENYL}-9H-PURINE	-1.20033
3h-Indole-5,6-Diol	-1.20031
(9S)-9-[(8-AMMONIOOCTYL)AMINO]-1,2,3,4,9,10-HEXAHYDROACRIDINIUM	-1.19821
ZK-805623	-1.19767
TACRINE(8)-4-AMINOQUINOLINE	-1.19682
Formaldehyde	-1.19583
[(1-{2[(4-Carbamimidoyl-Phenylamino)-Methyl]-1-Methyl-1h-Benzoimidazol-5-Yl}-Cyclopropyl)-Pyridin-2-Yl-Methyleneaminooxy]-Acetic Acid Ethyl Ester	-1.19447
(3aS)-3a-hydroxy-1-phenyl-1,2,3,3a-tetrahydro-4H-pyrrolo[2,3-b]quinolin-4-one	-1.19365
[1-(6-{6-[(1-methylethyl)amino]-1H-indazol-1-yl}pyrazin-2-yl)-1H-pyrrol-3-yl]acetic acid	-1.1926
2-{[(1R,2S)-2-aminocyclohexyl]amino}-4-[(3-methylphenyl)amino]pyrimidine-5-carboxamide	-1.19244
4-Fluorobenzylamine	-1.19228
1-GUANIDINO-4-(N-PHENYLMETHANESULFONYL-L-LEUCYL-L-PROLYLAMINO)BUTANE	-1.19189
Mephentermine	-1.19057
[3-(1,3,2-Dioxaborolan-2-Yloxy)Propyl]Guanidine	-1.19018
1-[3-({[(4-AMINO-5-FLUORO-2-METHYLQUINOLIN-3-YL)METHYL]THIO}METHYL)PHENYL]-2,2,2-TRIFLUOROETHANE-1,1-DIOL	-1.18945
Phosphorylcolamine	-1.18816
3-{5-[AMINO(IMINIO)METHYL]-1H-INDOL-2-YL}-5-METHOXY-1,1'-BIPHENYL-2-OLATE	-1.18801
Sofalcone	-1.18585
Topiramate	-1.18437
{(2S)-1-[N-(tert-butoxycarbonyl)glycyl]pyrrolidin-2-yl}methyl (3-chlorophenyl)acetate	-1.18312
(2R)-2-(4-chlorophenyl)-2-[4-(1H-pyrazol-4-yl)phenyl]ethanamine	-1.1828
1-DECYL-3-TRIFLUORO ETHYL-SN-GLYCERO-2-PHOSPHOMETHANOL	-1.18253
1-[1-(3-aminophenyl)-3-tert-butyl-1H-pyrazol-5-yl]-3-naphthalen-1-ylurea	-1.18199
3,8-Diamino-6-Phenyl-5-[6-[1-[2-[(1,2,3,4-Tetrahydro-9-Acridinyl)Amino]Ethyl]-1h-1,2,3-Triazol-4-Yl]Hexyl]-Phenanthridinium	-1.18117
Dornase alfa	-1.18085
beta-phenyl-D-phenylalanyl-N-propyl-L-prolinamide	-1.17706
Doxercalciferol	-1.17499
CRA_9678	-1.17416
3-(3,5-Dibromo-4-Hydroxy-Benzoyl)-2-Ethyl-Benzofuran-6-Sulfonic Acid Dimethylamide	-1.17395
Sparsentan	-1.17389
Aprinocarsen	-1.17367
Coagulation factor VII human	-1.17342
CRA_10433	-1.17285
4-CHLORO-6-(4-{4-[4-(METHYLSULFONYL)BENZYL]PIPERAZIN-1-YL}-1H-PYRAZOL-5-YL)BENZENE-1,3-DIOL	-1.17247
Apraclonidine	-1.17228
VIR201	-1.17226
2-(3-CHLORO-6-{[2,2-DIFLUORO-2-(1-OXIDOPYRIDIN-2-YL)ETHYL]AMINO}-1-OXIDOPYRIDIN-2-YL)-N-[1-(3-CHLOROPHENYL)ETHYL]ACETAMIDE	-1.17123
4-[3-(4-CHLOROPHENYL)-1H-PYRAZOL-5-YL]PIPERIDINE	-1.16968
Methylphosphinic Acid	-1.16864
4-{[(2R)-2-(2-methylphenyl)pyrrolidin-1-yl]carbonyl}benzene-1,3-diol	-1.16782
4-Phenylbutylamine	-1.16735
PRX-07034	-1.16731
1-(9-ethyl-9H-carbazol-3-yl)-N-methylmethanamine	-1.16677
(3aS)-3a-hydroxy-5-methyl-1-phenyl-1,2,3,3a-tetrahydro-4H-pyrrolo[2,3-b]quinolin-4-one	-1.16648
Zk-806450	-1.16403
(3s,6s,9r,10r,11s,12s,13e,15e,18s,21s)-18-{(1e,3e,7s,8s)-9-[(2s,3r,4s,5s,6r,9s,11s)-9-Ethyl-4-Hydroxy-3,5,11-Trimethyl-8-Oxo-1-Oxa-7-Azaspiro[5.5]Undec-2-Yl]-8-Hydroxy-1,7-Dimethylnona-1,3-Dienyl}-10,12-Dihydroxy-3-(3-Hydroxybenzyl)-6-Isopropyl-11-Methyl-	-1.16352
5-Hydroxymethyl-Chonduritol	-1.1634
S-NONYL-CYSTEINE	-1.16161
4-(METHYLSULFONYL)BENZENECARBOXIMIDAMIDE	-1.16141
Abiraterone	-1.15982
Tanespimycin	-1.15895
9-Butyl-8-(3-Methoxybenzyl)-9h-Purin-6-Amine	-1.15878
Methimazole	-1.1587
ZK-806711	-1.15704
Bis(5-Amidino-Benzimidazolyl)Methanone Zinc	-1.15651
Magnesium chloride	-1.15644
[4-(6-Chloro-Naphthalene-2-Sulfonyl)-Piperazin-1-Yl]-(3,4,5,6-Tetrahydro-2h-[1,4']Bipyridinyl-4-Yl)-Methanone	-1.15633
Rbt205 Inhibitor	-1.1557
1-[(2R)-2-aminobutanoyl]-N-(4-carbamimidoylbenzyl)-L-prolinamide	-1.15467
N-Alpha-(2-Naphthylsulfonyl)-N(3-Amidino-L-Phenylalaninyl)Isopipecolinic Acid Methyl Ester	-1.15244
9-Butyl-8-(2-Chloro-3,4,5-Trimethoxy-Benzyl)-9h-Purin-6-Ylamine	-1.15193
CRA_9334	-1.15182
3,8-Diamino-6-Phenyl-5-[6-[1-[2-[(1,2,3,4-Tetrahydro-9-Acridinyl)Amino]Ethyl]-1h-1,2,3-Triazol-5-Yl]Hexyl]-Phenanthridinium	-1.15033
3-Chloro-9-Ethyl-6,7,8,9,10,11-Hexahydro-7,11-Methanocycloocta[B]Quinolin-12-Amine	-1.14969
4-({[4-(3-METHYLBENZOYL)PYRIDIN-2-YL]AMINO}METHYL)BENZENECARBOXIMIDAMIDE	-1.14919
5-benzyl-1,3-thiazol-2-amine	-1.14834
CRA_10762	-1.1458
Quetiapine	-1.14542
Methylthioninium	-1.14497
Ferrous ascorbate	-1.14463
(2R,3R)-N^1^-[(1S)-2,2-DIMETHYL-1-(METHYLCARBAMOYL)PROPYL]-N^4^-HYDROXY-2-(2-METHYLPROPYL)-3-{[(1,3-THIAZOL-2-YLCARBONYL)AMINO]METHYL}BUTANEDIAMIDE	-1.14341
1-GUANIDINO-4-(N-NITRO-BENZOYLAMINO-L-LEUCYL-L-PROLYLAMINO)BUTANE	-1.14318
2-(6-CHLORO-3-{[2,2-DIFLUORO-2-(2-PYRIDINYL)ETHYL]AMINO}-2-OXO-1(2H)-PYRAZINYL)-N-[(2-FLUORO-6-PYRIDINYL)METHYL]ACETAMIDE	-1.14292
CRA_11092	-1.14255
1-ETHOXYCARBONYL-D-PHE-PRO-2(4-AMINOBUTYL)HYDRAZINE	-1.14225
SUVN-502	-1.14154
5-(2-hydroxyethyl)nonane-1,9-diol	-1.13945
rNAPc2	-1.13885
Azilsartan medoxomil	-1.13846
(3R)-8-(dioxidosulfanyl)-3-methyl-1,2,3,4-tetrahydroquinoline	-1.13784
TRANS-4-(GUANIDINOMETHYL)-CYCLOHEXANE-L-YL-D-3-CYCLOHEXYLALANYL-L-AZETIDINE-2-YL-D-TYROSINYL-L-HOMOARGININAMIDE	-1.13754
Nitrilotriacetic Acid	-1.13663
D-phenylalanyl-N-[(1S)-4-{[amino(iminio)methyl]amino}-1-(chloroacetyl)butyl]-L-prolinamide	-1.13438
Huperzine A	-1.13354
1-O-Octyl-2-Heptylphosphonyl-Sn-Glycero-3-Phosphoethanolamine	-1.13192
2-(6-CHLORO-3-{[2,2-DIFLUORO-2-(1-OXIDO-2-PYRIDINYL)ETHYL]AMINO}-2-OXO-1(2H)-PYRAZINYL)-N-[(2-FLUOROPHENYL)METHYL]ACETAMIDE	-1.13081
N-ETHYL-N-ISOPROPYL-3-METHYL-5-{[(2S)-2-(PYRIDIN-4-YLAMINO)PROPYL]OXY}BENZAMIDE	-1.13019
2-(6-{[(3-chloro-2-methylphenyl)sulfonyl]amino}pyridin-2-yl)-N,N-diethylacetamide	-1.12957
Biopterin	-1.12934
Bis(5-Amidino-2-Benzimidazolyl)Methane Ketone	-1.12912
1-(HYDROXYMETHYLENEAMINO)-8-HYDROXY-OCTANE	-1.12905
N-(5-CHLORO-BENZO[B]THIOPHEN-3-YLMETHYL)-2-[6-CHLORO-OXO-3-(2-PYRIDIN-2-YL-ETHYLAMINO)-2H-PYRAZIN-1-YL]-ACETAMIDE	-1.12842
[PHENYLALANINYL-PROLINYL]-[2-(PYRIDIN-4-YLAMINO)-ETHYL]-AMINE	-1.12773
Lypressin	-1.12772
N-[(2R,3S)-3-AMINO-2-HYDROXY-4-PHENYLBUTYL]-4-METHOXY-2,3,6-TRIMETHYLBENZENESULFONAMIDE	-1.12751
Terlipressin	-1.12619
MF268	-1.12408
Phosphatidyl serine	-1.12386
Emapalumab	-1.12353
Fontolizumab	-1.12254
4-Oxo-2-Phenylmethanesulfonyl-Octahydro-Pyrrolo[1,2-a]Pyrazine-6-Carboxylic Acid [1-(N-Hydroxycarbamimidoyl)-Piperidin-4-Ylmethyl]-Amide	-1.1225
Coproporphyrin I	-1.12169
Forasartan	-1.12115
N-(4-carbamimidoylbenzyl)-1-(3-phenylpropanoyl)-L-prolinamide	-1.12049
2-(Oxalyl-Amino)-4,7-Dihydro-5h-Thieno[2,3-C]Pyran-3-Carboxylic Acid	-1.11848
6-CHLORO-1-(2-{[(5-CHLORO-1-BENZOTHIEN-3-YL)METHYL]AMINO}ETHYL)-3-[(2-PYRIDIN-2-YLETHYL)AMINO]-1,4-DIHYDROPYRAZIN-2-OL	-1.11789
Methylphosphonic Acid Ester Group	-1.11782
Fusicoccin	-1.11726
Resiniferatoxin	-1.1158
Crc200 (Chiron-Behring)	-1.11483
(2R)-2-(5-CHLORO-2-THIENYL)-N-{(3S)-1-[(1S)-1-METHYL-2-MORPHOLIN-4-YL-2-OXOETHYL]-2-OXOPYRROLIDIN-3-YL}PROPENE-1-SULFONAMIDE	-1.11259
9-Butyl-8-(2,5-Dimethoxy-Benzyl)-9h-Purin-6-Ylamine	-1.11178
Lodoxamide	-1.11118
2,6-dicarboxynaphthalene	-1.11
2-(5-CHLORO-2-THIENYL)-N-{(3S)-1-[(1S)-1-METHYL-2-MORPHOLIN-4-YL-2-OXOETHYL]-2-OXOPYRROLIDIN-3-YL}ETHANESULFONAMIDE	-1.10998
RI 624	-1.10889
D-phenylalanyl-N-(3-chlorobenzyl)-L-prolinamide	-1.10805
Pentaerythritol tetranitrate	-1.10692
Ezatiostat	-1.10649
MDX-018	-1.10431
Salbutamol	-1.10391
6-CARBAMIMIDOYL-2-[2-HYDROXY-6-(4-HYDROXY-PHENYL)-INDAN-1-YL]-HEXANOIC ACID	-1.10335
2-(6-CHLORO-3-{[2,2-DIFLUORO-2-(2-PYRIDINYL)ETHYL]AMINO}-2-OXO-1(2H)-PYRAZINYL)-N-[(2-FLUORO-3-METHYL-6-PYRIDINYL)METHYL]ACETAMIDE	-1.10252
Lysophosphotidylserine	-1.10121
1D-myo-inositol 1,4,5-trisphosphate	-1.10027
Benralizumab	-1.10006
(Diaminomethyl-Methyl-Amino)-Acetic Acid	-1.09919
(S)-tacrine(10)-hupyridone	-1.09899
N,N-dimethylarginine	-1.09784
Tamatinib	-1.09697
N-(4-carbamimidoylbenzyl)-1-(4-methylpentanoyl)-L-prolinamide	-1.09688
6-[4-(2-piperidin-1-ylethoxy)phenyl]-3-pyridin-4-ylpyrazolo[1,5-a]pyrimidine	-1.09654
RPR128515	-1.09544
2-(2-METHYLPHENYL)-1H-INDOLE-6-CARBOXIMIDAMIDE	-1.09541
Mant-Adp	-1.09479
4-chloro-6-{5-[(2-morpholin-4-ylethyl)amino]-1,2-benzisoxazol-3-yl}benzene-1,3-diol	-1.09464
3-(2-Benzothiazolylthio)-1-Propanesulfonic Acid	-1.09411
D-phenylalanyl-N-{4-[amino(iminio)methyl]benzyl}-L-prolinamide	-1.09385
trifluoro-[hydroxy-[hydroxy-[2-(N-methyl-2-nitro-anilino)ethoxy]phosphoryl]oxy-phosphoryl]oxy-beryllium(1-)	-1.09368
Flovagatran	-1.09323
D-Arginine	-1.09218
2-(Thiomethylene)-4-Methylpentanoic Acid	-1.09122
CRA_17312	-1.0899
Clazosentan	-1.08945
Moxetumomab Pasudotox	-1.08888
Saprisartan	-1.08883
N-Hydroxy-4-Phosphono-Butanamide	-1.08874
2-(2-QUINOLIN-3-YLPYRIDIN-4-YL)-1,5,6,7-TETRAHYDRO-4H-PYRROLO[3,2-C]PYRIDIN-4-ONE	-1.08845
Insulin Detemir	-1.08825
8-BENZO[1,3]DIOXOL-,5-YLMETHYL-9-BUTYL-9H-	-1.08779
Ancestim	-1.08765
CRA_9785	-1.08705
Darusentan	-1.08608
8-(2,5-Dimethoxy-Benzyl)-2-Fluoro-9h-Purin-6-Ylamine	-1.08572
3-[4-AMINO-1-(1-METHYLETHYL)-1H-PYRAZOLO[3,4-D]PYRIMIDIN-3-YL]PHENOL	-1.08538
D-leucyl-N-(3-chlorobenzyl)-L-prolinamide	-1.0842
5-phenyl-1H-indazol-3-amine	-1.08372
Amylamine	-1.08278
2-[4-(DIMETHYLAMINO)PHENYL]-6-HYDROXY-3-METHYL-1,3-BENZOTHIAZOL-3-IUM	-1.0822
CRA_10991	-1.08025
Blinatumomab	-1.07989
Fibrinolysin	-1.07988
Trifluoperazine	-1.07983
N-(2-hydroxy-1,1-dimethylethyl)-1-methyl-3-(1H-pyrrolo[2,3-b]pyridin-2-yl)-1H-indole-5-carboxamide	-1.07959
3-cyclohexyl-D-alanyl-N-(3-chlorobenzyl)-L-prolinamide	-1.07753
D-leucyl-N-(4-carbamimidoylbenzyl)-L-prolinamide	-1.0771
3,4-Dihydroxy-1-Methylquinolin-2(1h)-One	-1.07625
Tuberculin Purified Protein Derivative	-1.07617
Celiprolol	-1.07611
Capsicum oleoresin	-1.076
2-Carboxyethylphosphonic Acid	-1.07547
N-[(1S)-1-(AMINOCARBONYL)-4-(ETHANIMIDOYLAMINO)BUTYL]BENZAMIDE	-1.07463
(3S)-1-{[4-(but-2-yn-1-yloxy)phenyl]sulfonyl}pyrrolidine-3-thiol	-1.07405
D-phenylalanyl-N-(3-fluorobenzyl)-L-prolinamide	-1.07364
(5S)-2-(cyclooctylamino)-5-methyl-5-propyl-1,3-thiazol-4(5H)-one	-1.07243
(5E,7S)-2-amino-7-(4-fluoro-2-pyridin-3-ylphenyl)-4-methyl-7,8-dihydroquinazolin-5(6H)-one oxime	-1.07213
VP025	-1.07148
L-thioproline	-1.07116
diethyl [(1R)-1,5-diaminopentyl]boronate	-1.06826
2-HYDROXY-3,5-DIIODOBENZOIC ACID	-1.06742
Gevokizumab	-1.0657
1-Deoxy-1-Thio-Heptaethylene Glycol	-1.06522
(2S)-2-(4-chlorophenyl)-2-[4-(1H-pyrazol-4-yl)phenyl]ethanamine	-1.06511
5-(5-CHLORO-2,4-DIHYDROXYPHENYL)-N-ETHYL-4-PIPERAZIN-1-YL-1H-PYRAZOLE-3-CARBOXAMIDE	-1.06509
[N-(BENZYLOXYCARBONYL)AMINO](4-AMIDINOPHENYL)METHANE-PHOSPHONATE	-1.06507
5-(5-CHLORO-2,4-DIHYDROXYPHENYL)-N-ETHYL-4-(4-METHOXYPHENYL)-1H-PYRAZOLE-3-CARBOXAMIDE	-1.06478
Proparacaine	-1.06394
1,3,5-BENZENETRICARBOXYLIC ACID	-1.06377
2-(2-CHLORO-4-FLUOROPHENOXY)-2-METHYL-N-[(1R,2S,3S,5S,7S)-5-(METHYLSULFONYL)-2-ADAMANTYL]PROPANAMIDE	-1.06313
N7-BUTYL-N2-(5-CHLORO-2-METHYLPHENYL)-5-METHYL[1,2,4]TRIAZOLO[1,5-A]PYRIMIDINE-2,7-DIAMINE	-1.06222
Chlorpropamide	-1.06064
Cyclopropyl-{4-[5-(3,4-Dichlorophenyl)-2-[(1-Methyl)-Piperidin]-4-Yl-3-Propyl-3h-Imidazol-4-Yl]-Pyrimidin-2-Yl}Amine	-1.06053
AC-(D)PHE-PRO-BOROLYS-OH	-1.06005
CRA_10972	-1.05991
3-(7-DIAMINOMETHYL-NAPHTHALEN-2-YL)-PROPIONIC ACID ETHYL ESTER	-1.05985
Emricasan	-1.05849
5-Bromonicotinamide	-1.05846
Propidium	-1.05818
Actelion-1	-1.05801
5-amino-2,4,6-tribromobenzene-1,3-dicarboxylic acid	-1.05791
Pentosan Polysulfate	-1.05785
2-[4-(4-Hydroxy-3-Isopropyl-Phenoxy)-3,5-Dimethyl-Phenyl]-2h-[1,2,4]Triazine-3,5-Dione	-1.056
(3E)-3-[(phenylamino)methylidene]dihydrofuran-2(3H)-one	-1.05557
CRA_9076	-1.05529
Acetrizoic acid	-1.05483
4-(2,5-DIAMINO-5-HYDROXY-PENTYL)-PHENOL	-1.05474
RPR131247	-1.05447
4-[(3AS,4R,7R,8AS,8BR)-2-(1,3-BENZODIOXOL-5-YLMETHYL)-7-HYDROXY-1,3-DIOXODECAHYDROPYRROLO[3,4-A]PYRROLIZIN-4-YL]BENZENECARBOXIMIDAMIDE	-1.054
Anaferon	-1.05335
CRA_10656	-1.05315
Bis(5-Amidino-2-Benzimidazolyl)Methane Ketone Hydrate	-1.05281
N-Alpha-(2-Naphthylsulfonyl)-N-(3-Amidino-L-Phenylalaninyl)-D-Pipecolinic Acid	-1.05106
4-(2,4-dichlorophenyl)-5-phenyldiazenyl-pyrimidin-2-amine	-1.04988
CRA_1802	-1.04968
3-CARBOXY-4-METHYL-5-PROPYL-2-FURANPROPIONIC	-1.04968
2,5-bis-O-{3-[amino(imino)methyl]phenyl}-1,4:3,6-dianhydro-D-glucitol	-1.04909
Zanapezil	-1.04903
2-amino-4-[2,4-dichloro-5-(2-pyrrolidin-1-ylethoxy)phenyl]-N-ethylthieno[2,3-d]pyrimidine-6-carboxamide	-1.04901
(3aS)-3a-hydroxy-7-methyl-1-phenyl-1,2,3,3a-tetrahydro-4H-pyrrolo[2,3-b]quinolin-4-one	-1.04765
Atrasentan	-1.04697
Calcium acetate	-1.04668
Oxymetazoline	-1.04604
Auranofin	-1.04561
8-(6-BROMO-BENZO[1,3]DIOXOL-5-YLSULFANYL)-9-(3-ISOPROPYLAMINO-PROPYL)-ADENINE	-1.04518
Sp-Adenosine-3',5'-Cyclic-Monophosphorothioate	-1.04416
RWJ-51084	-1.04332
N-[(Furan-2-Yl)Carbonyl]-(S)-Leucyl-(R)-[1-Amino-2(1h-Indol-3-Yl)Ethyl]-Phosphonic Acid	-1.04195
Aeruginosin 98-B	-1.04191
Chlorphenesin	-1.0415
Canakinumab	-1.0405
Fondaparinux	-1.04022
Ganstigmine	-1.04017
7-Nitroindazole	-1.03922
AC-(D)PHE-PRO-BOROHOMOLYS-OH	-1.03904
Carbenoxolone	-1.03866
ACP-104	-1.03813
CRA_1801	-1.03664
(2s,4r)-1-Acetyl-N-[(1s)-4-[(Aminoiminomethyl)Amino]-1-(2-Benzothiazolylcarbonyl)Butyl]-4-Hydroxy-2-Pyrrolidinecarboxamide	-1.03602
N-[2-(carbamimidamidooxy)ethyl]-2-{6-cyano-3-[(2,2-difluoro-2-pyridin-2-ylethyl)amino]-2-fluorophenyl}acetamide	-1.03528
(1R,2S)-2-Phenylcyclopropanaminium	-1.03478
Bis(5-Amidino-2-Benzimidazolyl)Methanone	-1.03434
Nonacog beta pegol	-1.03411
Felbinac	-1.0333
2,5-O,O-BIS-{4',4''-AMIDINOPHENYL}-1,4:3,6-DIANHYDRO-D-SORBITOL	-1.0333
beta-L-fucose	-1.03273
Efaproxiral	-1.03207
CRA_23653	-1.02961
K201	-1.02916
CRA_17693	-1.02802
4-(1,3-Benzodioxol-5-Yl)-5-(5-Ethyl-2,4-Dihydroxyphenyl)-2h-Pyrazole-3-Carboxylic Acid	-1.02688
Canfosfamide	-1.02673
N-{3-[5-(1H-1,2,4-triazol-3-yl)-1H-indazol-3-yl]phenyl}furan-2-carboxamide	-1.02545
N-(4-ACETYLPHENYL)-5-(5-CHLORO-2,4-DIHYDROXYPHENYL)-1H-PYRAZOLE-4-CARBOXAMIDE	-1.02381
6-(3-BROMO-2-NAPHTHYL)-1,3,5-TRIAZINE-2,4-DIAMINE	-1.02364
Tiratricol	-1.02305
ETHYL 4-[(4-METHYLPYRIDIN-2-YL)AMINO]PIPERIDINE-1-CARBOXYLATE	-1.02184
2-[2-(2-FLUOROPHENYL)PYRIDIN-4-YL]-1,5,6,7-TETRAHYDRO-4H-PYRROLO[3,2-C]PYRIDIN-4-ONE	-1.02166
WX-UK1	-1.01978
(2E)-3-(2-OCT-1-YN-1-YLPHENYL)ACRYLIC ACID	-1.01843
Angiotensin II	-1.01825
1-{[1-(2-AMINO-3-PHENYL-PROPIONYL)-PYRROLIDINE-2-CARBONYL]-AMINO}-2-(3-CYANO-PHENYL)-ETHANEBORONIC ACID	-1.01792
N-ALLYL-5-AMIDINOAMINOOXY-PROPYLOXY-3-CHLORO-N-CYCLOPENTYLBENZAMIDE	-1.01633
3-AMINO-3-BENZYL-9-CARBOXAMIDE[4.3.0]BICYCLO-1,6-DIAZANONAN-2-ONE	-1.01566
[2(Formyl-Hydroxy-Amino)-Ethyl]-Phosphonic Acid	-1.01488
N-Tridecanoic Acid	-1.01393
Topiroxostat	-1.01351
4-[(5-methoxy-2-methylphenoxy)methyl]pyridine	-1.01342
2,6-Dihydroanthra/1,9-Cd/Pyrazol-6-One	-1.01202
Propiolactone	-1.01098
2-AMINO-4-(2,4-DICHLOROPHENYL)-N-ETHYLTHIENO[2,3-D]PYRIMIDINE-6-CARBOXAMIDE	-1.01033
Meprobamate	-1.01021
Tolazoline	-1.01007
methyl (1R,2S)-2-(hydroxycarbamoyl)-1-{4-[(2-methylquinolin-4-yl)methoxy]benzyl}cyclopropanecarboxylate	-1.00934
6-Nitroindazole	-1.00896
3'-Phosphate-Adenosine-5'-Phosphate Sulfate	-1.00805
N-(Chlorophenyl)-N'-Hydroxyguanidine	-1.00775
9-Butyl-8-(4-Methoxybenzyl)-9h-Purin-6-Amine	-1.00659
2-[N'-(4-AMINO-BUTYL)-HYDRAZINOCARBONYL]-PYRROLIDINE-1-CARBOXYLIC ACID BENZYL ESTER	-1.00637
3-{[4-(but-2-yn-1-yloxy)phenyl]sulfonyl}propane-1-thiol	-1.00612
[3,5-Dibromo-4-(4-Hydroxy-3-Phenethylcarbamoyl-Phenoxy)-Phenyl]-Acetic Acid	-1.00433
6-(2-HYDROXY-CYCLOPENTYL)-7-OXO-HEPTANAMIDINE	-1.00383
Dyclonine	-1.00357
1,4:3,6-Dianhydro-2-O-(3-carbamimidoylphenyl)-5-O-(4-carbamimidoylphenyl)-D-glucitol	-1.00288
Cibacron Blue	-1.00222
Alvespimycin	-1.0012
Arotinolol	-1.00087
(5S)-2-{[(1S)-1-(4-fluorophenyl)ethyl]amino}-5-(1-hydroxy-1-methylethyl)-5-methyl-1,3-thiazol-4(5H)-one	-0.999499
Tubocurarine	-0.998748
liposomal prostaglandin E1	-0.998743
N-{[4-(but-2-yn-1-yloxy)phenyl]sulfonyl}-5-methyl-D-tryptophan	-0.998651
Hydroxy(oxo)(2-{(1S)-2,2,2-trifluoro-1-[2-(trimethylarsonio)ethoxy]ethyl}phenyl)ammonium	-0.998651
1-BENZYL-4-[(5,6-DIMETHOXY-1-INDANON-2-YL)METHYL]PIPERIDINE	-0.998003
2H-Benzimidazol-2-amine	-0.997614
2-(2-METHYLPHENYL)-1H-INDOLE-5-CARBOXIMIDAMIDE	-0.997102
Miltefosine	-0.995028
Coa-S-Acetyl Tryptamine	-0.994573
6-[3-(4-Morpholinyl)Propyl]-2-(3-Nitrophenyl)-5-Thioxo-5,6,-Dihydro-7h-Thienol[2',3':4,5]Pyrrolo[1,2-C]Imidazol-7-One	-0.992935
Sobetirome	-0.991681
Lyme disease vaccine (recombinant OspA)	-0.991552
(1S,3R,6S)-4-oxo-6-{4-[(2-phenylquinolin-4-yl)methoxy]phenyl}-5-azaspiro[2.4]heptane-1-carboxylic acid	-0.98942
RAF-265	-0.988362
4-[(1E,7E)-8-(2,6-DIOXO-1,2,3,6-TETRAHYDROPYRIMIDIN-4-YL)-3,6-DIOXA-2,7-DIAZAOCTA-1,7-DIEN-1-YL]BENZOIC ACID	-0.988082
1-(2-Amidinophenyl)-3-(Phenoxyphenyl)Urea	-0.987883
Hexylcaine	-0.987685
INCB13739	-0.987129
L-Phospholactate	-0.987119
Selenium Sulfide	-0.98698
1-(4-HEXYLPHENYL)PROP-2-EN-1-ONE	-0.986477
4-(1R,3AS,4R,8AS,8BR)-[1-DIFLUOROMETHYL-2-(4-FLUOROBENZYL)-3-OXODECAHYDROPYRROLO[3,4-A]PYRROLIZIN-4-YL]BENZAMIDINE	-0.986392
(2R)-N-HYDROXY-2-[(3S)-3-METHYL-3-{4-[(2-METHYLQUINOLIN-4-YL)METHOXY]PHENYL}-2-OXOPYRROLIDIN-1-YL]PROPANAMIDE	-0.986333
Trilostane	-0.986151
6-(5-BROMO-2-HYDROXYPHENYL)-2-OXO-4-PHENYL-1,2-DIHYDROPYRIDINE-3-CARBONITRILE	-0.984799
4-{[5-chloro-4-(1H-indol-3-yl)pyrimidin-2-yl]amino}-N-ethylpiperidine-1-carboxamide	-0.984792
Metacycline	-0.984687
Trodusquemine	-0.98381
2-(5-CHLORO-2-THIENYL)-N-{(3S)-1-[(1S)-1-METHYL-2-MORPHOLIN-4-YL-2-OXOETHYL]-2-OXOPYRROLIDIN-3-YL}ETHENESULFONAMIDE	-0.98272
4-(5-BENZENESULFONYLAMINO-1-METHYL-1H-BENZOIMIDAZOL-2-YLMETHYL)-BENZAMIDINE	-0.982525
N-cyclohexyl-4-imidazo[1,2-a]pyridin-3-yl-N-methylpyrimidin-2-amine	-0.979895
1-[(2R)-2-aminobutanoyl]-N-(3-chlorobenzyl)-L-prolinamide	-0.979791
5-Nitroindazole	-0.976994
Furoyl-Leucine	-0.974547
2,3-diphenyl-1H-indole-7-carboxylic acid	-0.973666
5-CYANO-FURAN-2-CARBOXYLIC ACID [5-HYDROXYMETHYL-2-(4-METHYL-PIPERIDIN-1-YL)-PHENYL]-AMIDE	-0.973267
Ferrous gluconate	-0.972991
SR 121463	-0.972565
Pegaptanib	-0.971551
1-[2-AMINO-2-CYCLOHEXYL-ACETYL]-PYRROLIDINE-3-CARBOXYLIC ACID 5-CHLORO-2-(2-ETHYLCARBAMOYL-ETHOXY)-BENZYLAMIDE	-0.970727
Inositol 1,3,4,5-Tetrakisphosphate	-0.970639
4-TERT-BUTYLBENZENESULFONIC ACID	-0.969857
2-(4-HYDROXY-5-PHENYL-1H-PYRAZOL-3-YL)-1H-BENZOIMIDAZOLE-5-CARBOXAMIDINE	-0.968535
(3,3-dimethylpiperidin-1-yl)(6-(3-fluoro-4-methylphenyl)pyridin-2-yl)methanone	-0.968362
[[CYCLOHEXANESULFONYL-GLYCYL]-3[PYRIDIN-4-YL-AMINOMETHYL]ALANYL]PIPERIDINE	-0.968336
4-methyl-7,8-dihydro-5H-thiopyrano[4,3-d]pyrimidin-2-amine	-0.967416
8-(2-Chloro-3,4,5-Trimethoxy-Benzyl)-9-Pent-4-Ylnyl-9h-Purin-6-Ylamine	-0.96626
N-[(2R,3S)-3-AMINO-2-HYDROXY-4-PHENYLBUTYL]NAPHTHALENE-2-SULFONAMIDE	-0.964655
2-[4-({[(3,5-DICHLOROPHENYL)AMINO]CARBONYL}AMINO)PHENOXY]-2-METHYLPROPANOIC ACID	-0.963919
1-(2-{[(6-AMINO-2-METHYLPYRIDIN-3-YL)METHYL]AMINO}ETHYL)-6-CHLORO-3-[(2,2-DIFLUORO-2-PYRIDIN-2-YLETHYL)AMINO]-1,4-DIHYDROPYRAZIN-2-OL	-0.963673
Lepirudin	-0.963311
N-{3-METHYL-5-[2-(PYRIDIN-4-YLAMINO)-ETHOXY]-PHENYL}-BENZENESULFONAMIDE	-0.963076
4-[4-(2,3-DIHYDRO-1,4-BENZODIOXIN-6-YL)-3-METHYL-1H-PYRAZOL-5-YL]-6-ETHYLBENZENE-1,3-DIOL	-0.96216
Ferrous fumarate	-0.961365
N-{1-[(1-carbamoylcyclopropyl)methyl]piperidin-4-yl}-N-cyclopropyl-4-[(1S)-2,2,2-trifluoro-1-hydroxy-1-methylethyl]benzamide	-0.961255
Patupilone	-0.960571
Astaxanthin	-0.958862
Metaraminol	-0.957585
Ferrous glycine sulfate	-0.95755
[truncated: 3,645 more rows]
